# Supplementary material for: Genetic architecture of the metabolic pathway of salicylic acid biosynthesis in Populus
Source: Oxford University Press journal article supplement (doi:10.1093/treephys/tpab068), 2021-05-06
Supplement: figure_s2_tpab068.docx [file figure_s2_tpab068.docx]

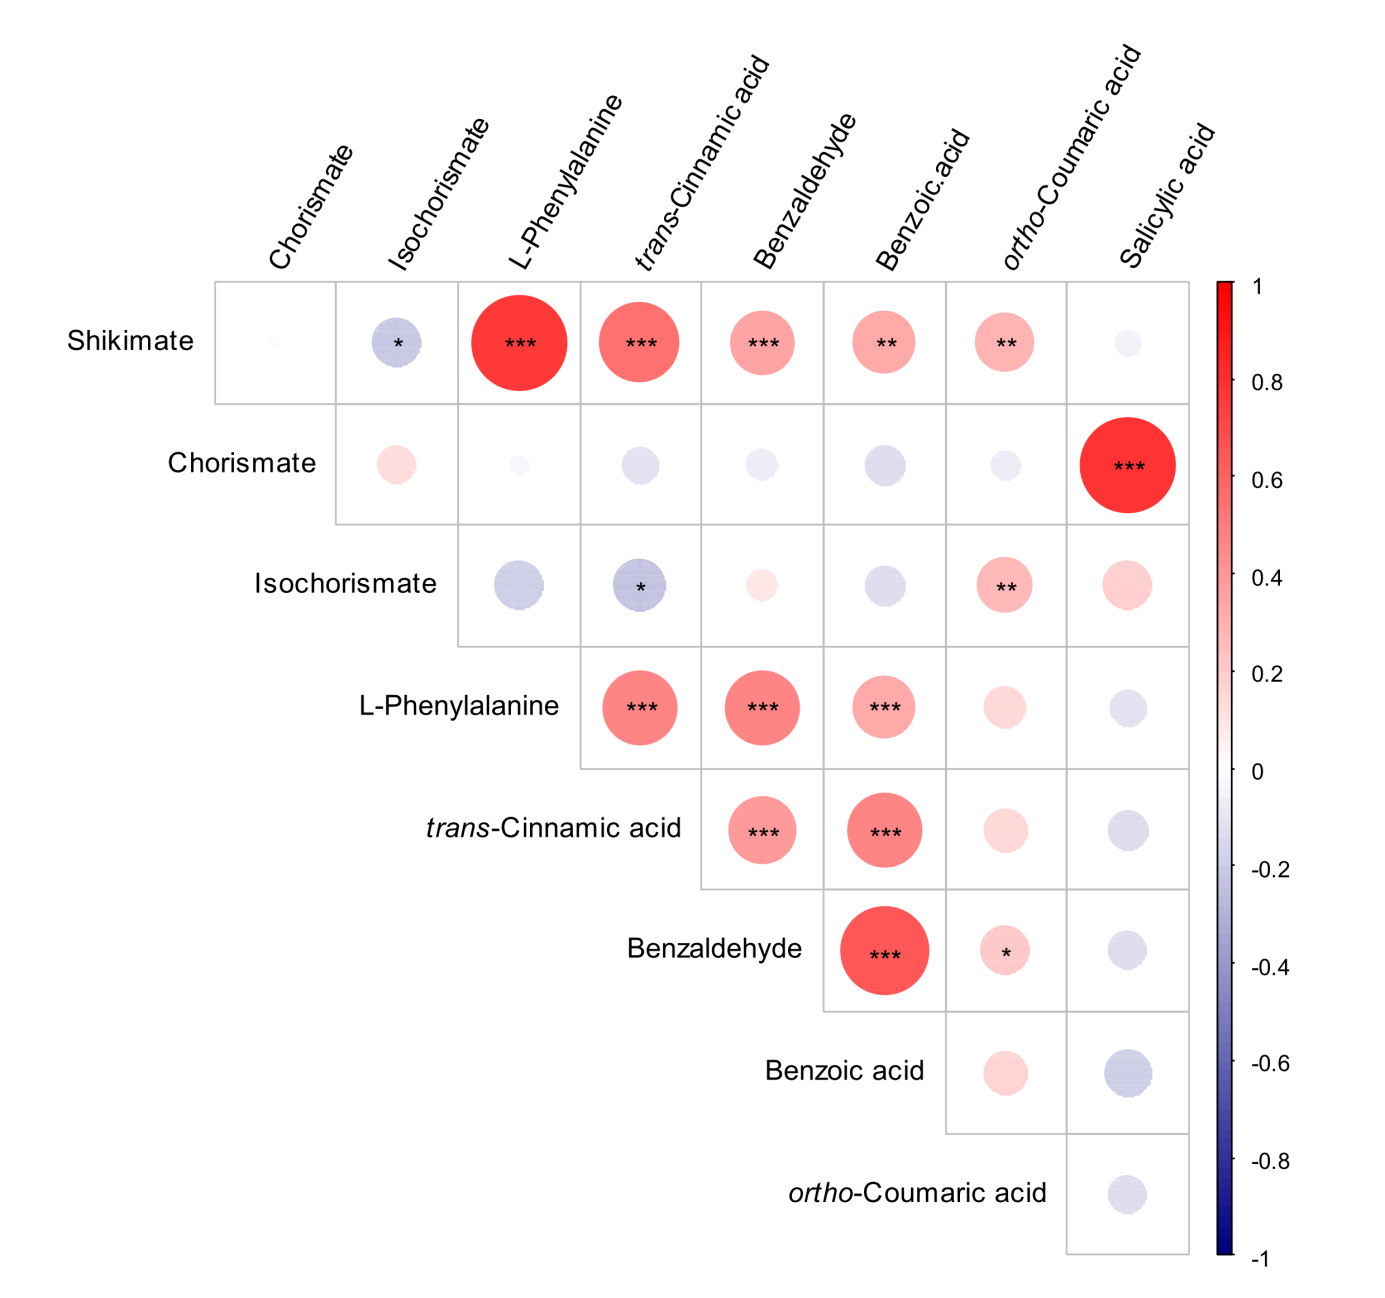


**Figure S2 Correlation matrix of nine metabolic traits involved in SA biosynthesis.** Blue indicates negative correlations and red indicates positive correlations. The size of each circle is proportional to the strength of the correlation (*, *P*<0.05; **, *P*< 0.01; ***, *P*< 0.001; Student’s *t*-test).
