# Supplementary material for: Genetic architecture of the metabolic pathway of salicylic acid biosynthesis in Populus
Source: Oxford University Press journal article supplement (doi:10.1093/treephys/tpab068), 2021-05-06
Supplement: figure_s3_tpab068.docx [file figure_s3_tpab068.docx]

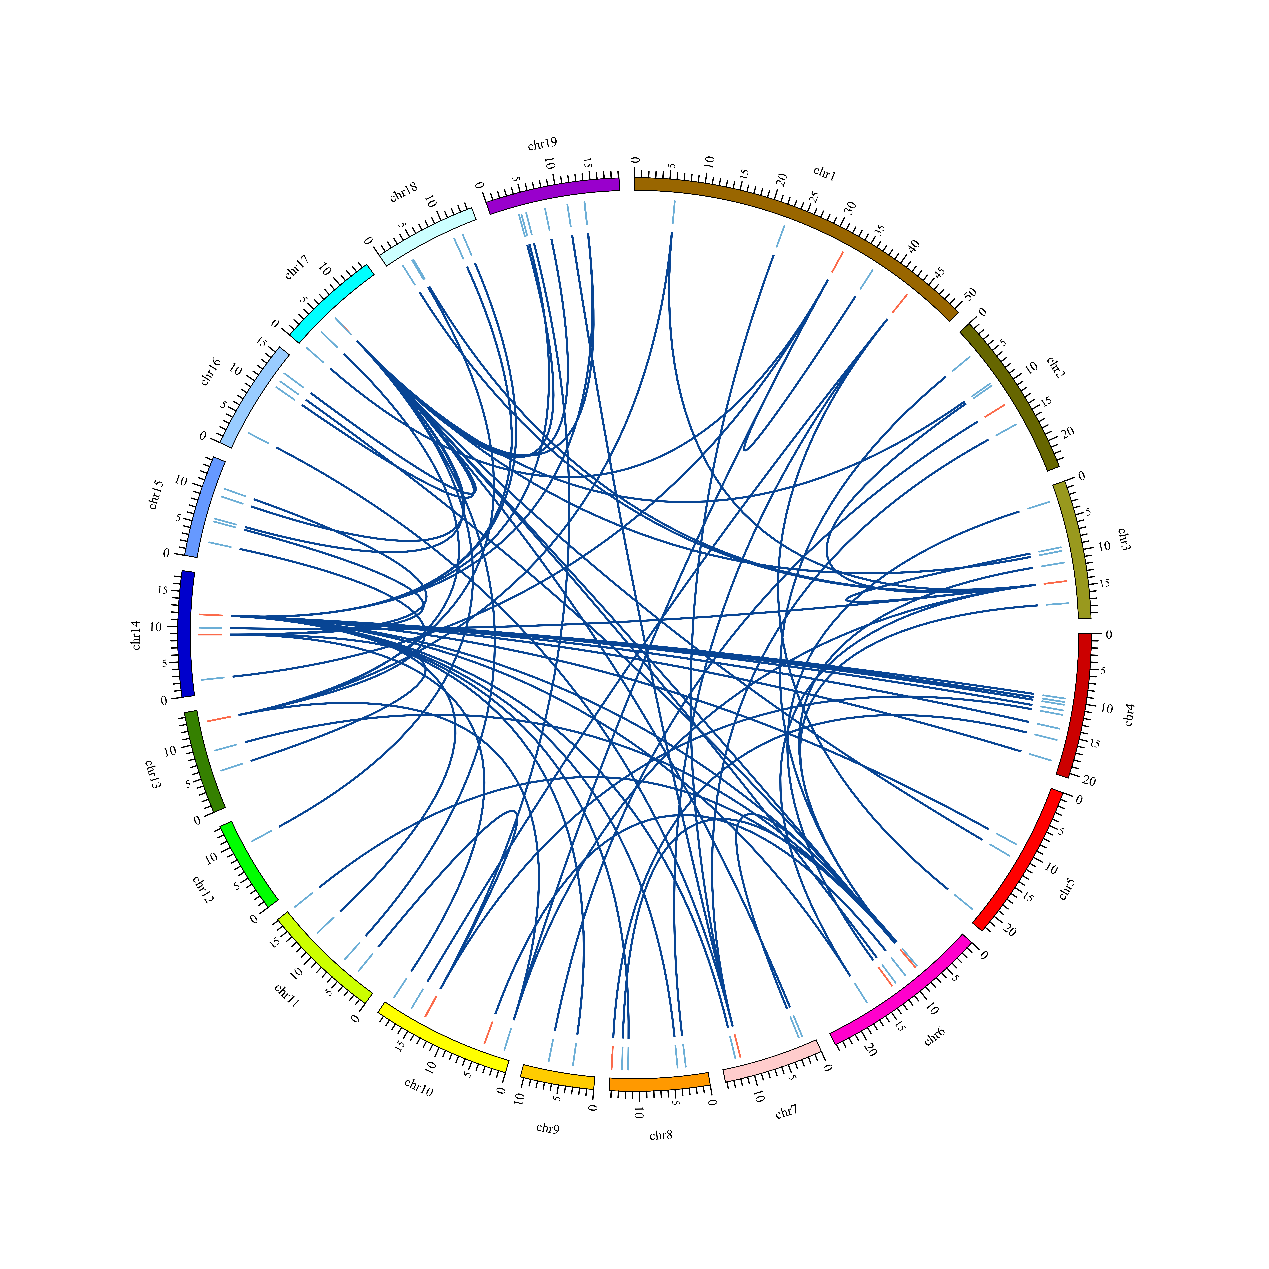


**Figure S3 The circular diagram shows the eQTL results**. The outer circle represents the chromosomes. The middle circle indicates the chromosome position of SNPs (blue), expression genes (red). The interior lines represents the associations between SNPs and expression genes.
