# Supplementary material for: Genetic architecture of the metabolic pathway of salicylic acid biosynthesis in Populus
Source: Oxford University Press journal article supplement (doi:10.1093/treephys/tpab068), 2021-05-06
Supplement: figure_s4_tpab068.docx [file figure_s4_tpab068.docx]

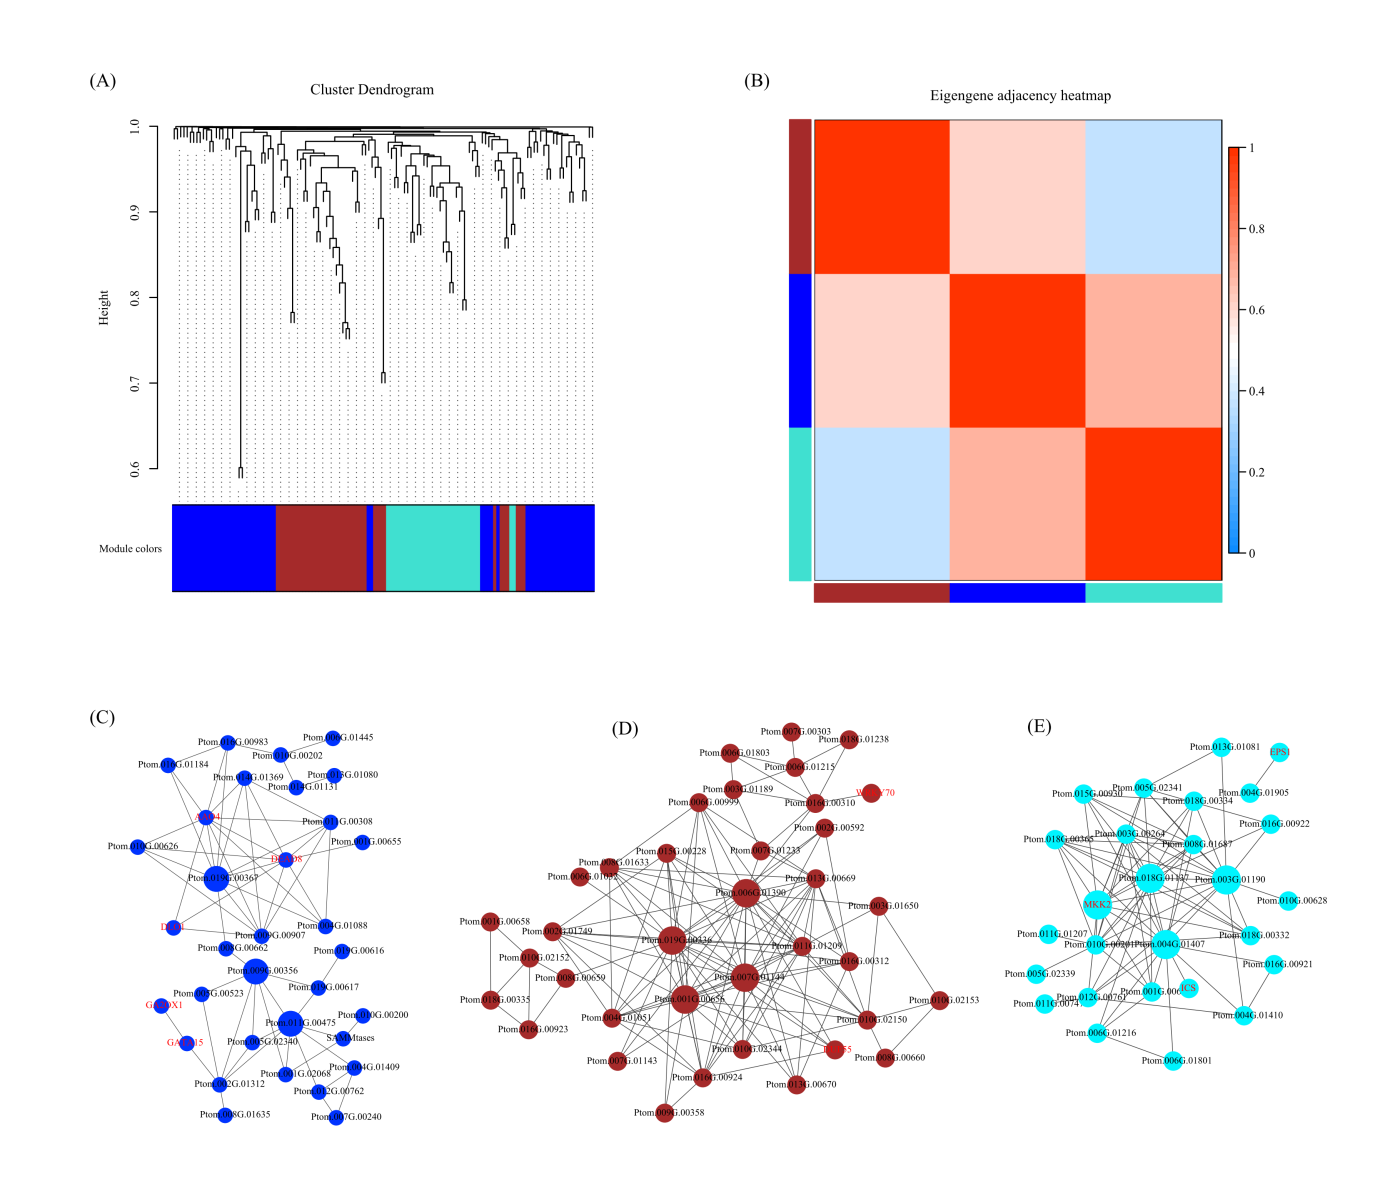


**Figure S4 Weighted gene co-expression network.** (A–B) Top, dendrogram showing gene clustering. Each branch represents a gene. Middle, color-coded module assignment. (C–E) Co-expression interactions of the blue (C), brown (D), and turquoise (E) modules. For each module, the weighted values were greater than 0.05 are presented.
