# Supplementary material for: Genetic architecture of the metabolic pathway of salicylic acid biosynthesis in Populus
Source: Oxford University Press journal article supplement (doi:10.1093/treephys/tpab068), 2021-05-06
Supplement: supplement_methods_tpab068_tpab068.doc [file supplement_methods_tpab068_tpab068.doc]

**Method S1**

**DNA extraction, libraries construction, raw data trimming, and SNP calling following resequencing of the association population**

For whole-genome resequencing, fresh leaves were collected from the 300 individuals of the *Populus tomentosa* association population, followed by total genomic DNA extraction using the DNeasy Plant Mini kit (Qiagen, Shanghai, China) following the manufacturer’s protocol. The extracted DNA was used for library construction according to the manufacturer’s recommendation (Illumina). Briefly, total DNA was randomly sheared into small fragments (200–300 bp) using a Covaris E210 ultrasonicator (Covaris, Inc., Woburn, MA, USA), followed by the overhangs converting into blunt ends using T4 DNA polymerase and DNA polymerase I Klenow fragment. After adenylation of 3′ ends of DNA fragments, Illumina adaptors (Illumina, San Diego, CA, USA) were then ligated to the ends of these DNA fragments using DNA ligase. DNA fragments that have adaptor molecules on both ends were selectively enriched using Illumina PCR Primer Cocktail and PCR products were purified (AMPure XP system) and quantified using the Agilent high-sensitivity DNA assay on the Agilent Bioanalyzer 2100 system. Finally, short-read sequence data were generated for each individual tree using an Illumina Genome Analyzer.

Raw reads were trimmed through a series of quality control (QC) procedures. QC standards were as follows: 1) removing reads with ≥10% unidentified nucleotides (N); 2) removing reads with >50% bases having phred quality <5; 3) removing reads with >10 nt aligned to the adapter, allowing ≤10% mismatches; and 4) removing putative PCR duplicates generated by PCR amplification in the library construction process (completely identical two paired-end reads).

Each sample clean reads were aligned to *P. tomentosa* reference genome by the Burrows-Wheeler Aligner (v0.7.5a-r405) using default parameters (Li and Durbin 2009). The low mapping quality (MQ <20) reads were filtered in SAMtools program (v1.1)(Li et al. 2009). Then, we performed genome variants calling by Genome Analysis Toolkit 4.0 (GATK 4.0, https://gatk.broadinstitute.org/hc/en-us) with conservative parameters (SNP: QD <5.0 || MQ <40.0 || FS >60.0 || SOR >3.0 || MQRankSum <-12.5 || ReadPosRankSum <-8.0). Finally, we pruned SNPs with only two alleles by Vcftools_0.1.13 (Danecek et al. 2011). Following, SNPs with not two alleles, a minor allele frequency (MAF) < 0.05 and a missing genotype > 0.2 were removed by VCFtools, and a total of 13,063,406 SNPs were identified across all individuals (Danecek et al. 2011). In addition, the snpEff software was used to annotate the SNPs to different genomic annotation categories, which including synonymous and non-synonymous in exon region (Cingolani et al. 2012).

**Method S2**

**RNA-seq of association population**

Total RNA of fresh leaves samples of the association population’s 300 individuals was extracted by a Qiagen RNeasy kit (Qiagen China, Shanghai, China) according to the manufacturer’s protocols (Xiao et al., 2020). Additionally, DNase digestion was performed at the time of RNA purification using an RNase Free DNase set (Qiagen). RNA samples were assessed with a NanoDrop ND-1000 (A260/A280 = 1.91) and Agilent Bioanalyzer 2100 (28S/18S = 1.6). A total of 3 μg RNA per sample was used to build strand-specific RNA-seq library using the NEBNext® UltraTM RNA Library Prep Kit for Illumina® (NEB, USA) following manufacturer’s recommendations and index codes. The clustering of the index-coded samples was performed on a cBot Cluster Generation System using TruSeq PE Cluster Kit v3-cBot-HS (Illumia) according to the manufacturer’s instructions. After being quantified with a Qubit 2.0 Fluorometer and Agilent 2100 Bioanalyzer, the strand-specific libraries were sequenced on an Illumina HiSeq 2500 instrument, which generated 100-nt paired-end reads. Library construction and paired-end sequencing were performed by Shanghai Biotechnology Corporation (Shanghai, China). To obtain the clean data, the reads containing adapter, reads containing ploy-N and low-quality reads were removed from raw data by in-house perl scripts. Next, the clean data were uniquely mapped to the *P. tomentosa* reference genome using TopHat 2.1.1 with the default options (Trapnell et al. 2009). The isoform levels and gene level counts of the assembled transcripts were computed and normalized based on fragments per kilobase of transcript per million fragments (FPKM) values using Cufflinks v2.1.1 with default options (Trapnell et al. 2012).

**References:**

Cingolani, P., A. Platts, L.L. Wang, M. Coon, T. Nguyen, L. Wang, S.J. Land, X. Lu and D.M. Ruden 2012. A program for annotating and predicting the effects of single nucleotide polymorphisms, SnpEff: SNPs in the genome of Drosophila melanogaster strain w1118; iso-2; iso-3. Fly (Austin). 6:80-92.

Danecek, P., A. Auton, G. Abecasis, C.A. Albers, E. Banks, M.A. DePristo, R.E. Handsaker, G. Lunter, G.T. Marth, S.T. Sherry, G. McVean and R. Durbin 2011. The variant call format and VCFtools. Bioinformatics. 27:2156-8.

Li, H. and R. Durbin 2009. Fast and accurate short read alignment with Burrows-Wheeler transform. Bioinformatics. 25:1754-60.

Li, H., B. Handsaker, A. Wysoker, T. Fennell, J. Ruan, N. Homer, G. Marth, G. Abecasis and R. Durbin 2009. The Sequence Alignment/Map format and SAMtools. Bioinformatics. 25:2078-9.

Trapnell, C., A. Roberts, L. Goff, G. Pertea, D. Kim, D.R. Kelley, H. Pimentel, S.L. Salzberg, J.L. Rinn and L. Pachter 2012. Differential gene and transcript expression analysis of RNA-seq experiments with TopHat and Cufflinks. Nat Protoc. 7:562-78.

Trapnell, C., L. Pachter and S.L. Salzberg 2009. TopHat: discovering splice junctions with RNA-Seq. Bioinformatics. 25:1105-11.
