# Supplementary material for: Genetic architecture of the metabolic pathway of salicylic acid biosynthesis in Populus
Source: Oxford University Press journal article supplement (doi:10.1093/treephys/tpab068), 2021-05-06
Supplement: supplemental_table_s1-s10_tpab068.xlsx [file supplemental_table_s1-s10_tpab068.xlsx]

## Sheet: S1
Table S1 Phenotypic variations in nine metabolites in the association population of P. tomentosa.
Metabolite traits	min	max	average	stdevp	CV
Isochorismate	222000	802000	429990	116087	0.269976
Benzaldehyde	263000	1230000	640980	198585	0.309814
ortho-Coumaric acid	292000	2450000	1.13175e+06	413938	0.365749
L-Phenylalanine	422000	2860000	830120	405819	0.488868
Benzoic acid	369000	6930000	1.59579e+06	1.0425e+06	0.653283
trans-Cinnamic acid	2120	237000	24628.4	33200.2	1.34805
Shikimate	154000	6520000	1.31865e+06	1.33671e+06	1.0137
Salicylic Acid	1660000	23300000	6.80238e+06	4.04072e+06	0.594016
Chorismate	356000	2540000	1100814	397345	0.360956

## Sheet: S2
Table S2 Phenotypic correlations for nine metabolites in the association population of P. tomentosa.
Metabolite traits		Isochorismate	Benzaldehyde	ortho-Coumaric acid	L-Phenylalanine	Benzoic acid	trans-Cinnamic acid	Shikimate	Salicylic Acid	Chorismate
Isochorismate	Pearson correlation	1	0.0826828	0.266293	-0.192131	-0.136147	-0.222184	-0.203127	0.196176	0.125362
	T-test		0.153126	2.89946e-06	0.000873992	0.0183103	0.000143634	0.000399294	0.000633281	0.0299432
Benzaldehyde	Pearson correlation	0.0826828	1	0.206549	0.461339	0.654239	0.388431	0.353023	-0.120655	-0.0787528
	T-test	0.153126		0.000316381	4.64716e-17	4.96167e-38	8.29168e-12	3.11853e-10	0.0367338	0.173685
ortho-Coumaric acid	Pearson correlation	0.266293	0.206549	1	0.146551	0.165191	0.158894	0.287463	-0.126498	-0.0743921
	T-test	2.89946e-06	0.000316381		0.0114506	0.00411804	0.00689265	4.07247e-07	0.0284762	0.198824
L-Phenylalanine	Pearson correlation	-0.192131	0.461339	0.146551	1	0.337755	0.478542	0.767661	-0.109314	-0.0277723
	T-test	0.000873992	4.64716e-17	0.0114506		2.33426e-09	1.02032e-17	5.95323e-59	0.0598934	0.633581
Benzoic acid	Pearson correlation	-0.136147	0.654239	0.165191	0.337755	1	0.477694	0.320813	-0.182382	-0.136483
	T-test	0.0183103	4.96167e-38	0.00411804	2.33426e-09		8.0013e-18	1.31266e-08	0.00151178	0.0180225
trans-Cinnamic acid	Pearson correlation	-0.222184	0.388431	0.158894	0.478542	0.477694	1	0.544748	-0.139318	-0.114805
	T-test	0.000143634	8.29168e-12	0.00689265	1.02032e-17	8.0013e-18		1.17577e-23	0.0180021	0.0516221
Shikimate	Pearson correlation	-0.203127	0.353023	0.287463	0.767661	0.320813	0.544748	1	-0.0591086	-0.011225
	T-test	0.000399294	3.11853e-10	4.07247e-07	5.95323e-59	1.31266e-08	1.17577e-23		0.307534	0.846475
Salicylic Acid	Pearson correlation	0.196176	-0.120655	-0.126498	-0.109314	-0.182382	-0.139318	-0.0591086	1	0.780631
	T-test	0.000633281	0.0367338	0.0284762	0.0598934	0.00151178	0.0180021	0.307534		8.74289e-63
Chorismate	Pearson correlation	0.125362	-0.0787528	-0.0743921	-0.0277723	-0.136483	-0.114805	-0.011225	0.780631	1
	T-test	0.0299432	0.173685	0.198824	0.633581	0.0180225	0.0516221	0.846475	8.74289e-63

## Sheet: S3
Table S3 Detailed information about the significant SNPs associated with metabolites in the association population of P. tomentosa
Metabolite traits	SNP_ID	allele	P_value	PVE in MLM	PVE in GLM	selective sweep	Reported gene
Benzaldehyde	1_32103939	G/A	8.80871e-08	0.200567	0.1983	Y	Ptom.001G.02959
	8_14091182	A/G	1.34959e-07	0.192991	0.2248		Ptom.008G.01778
Benzoic acid	8_14091182	A/G	2.35959e-08	0.250375	0.2333		Ptom.008G.01778
	11_4778531	G/C	1.49436e-07	0.20422	0.1802
	14_11858370	G/A	1.79771e-07	0.191857	0.2036	Y	Ptom.014G.01369
Chorismate	14_8877941	A/G	1.45359e-07	0.253344	0.2543		Ptom.014G.01131
	13_12838091	C/G	1.5035e-07	0.241814	0.2422		Ptom.013G.01080 Ptom.013G.01081 Ptom.013G.01082
	6_12725869	G/C	2.2869e-07	0.235644	0.2356		Ptom.006G.01445
	6_12725876	G/A	2.2869e-07	0.235644	0.2356		Ptom.006G.01445
	6_8331234	A/G	2.63446e-07	0.130717	0.1344		Ptom.006G.01031 Ptom.006G.01032
	17_10603973	G/A	2.97398e-07	0.258369	0.2576
	17_6360088	C/T	3.34161e-07	0.188666	0.1845		Ptom.017G.00569
	5_3978460	G/A	3.47025e-07	0.0843945	0.0884	Y	Ptom.005G.00523
Isochorismate	2_12439328	A/G	1.01959e-07	0.190186	0.1213		Ptom.002G.01749 Ptom.002G.01750
	2_12439320	A/G	1.53527e-07	0.189485	0.1026		Ptom.002G.01749 Ptom.002G.01750
	12_8084349	A/T	2.70859e-07	0.0964289	0.0996		Ptom.012G.00656
L-Phenylalanine	3_15744352	C/A	6.08947e-13	0.26418	0.2623	Y	Ptom.003G.01748
	10_13821766	A/T	7.28521e-08	0.223115	0.2215		Ptom.010G.01912
	19_9845607	A/G	7.30859e-08	0.244096	0.2441	Y	Ptom.019G.00564 Ptom.019G.00565
	7_11316472	G/A	9.61294e-08	0.209759	0.2509		Ptom.007G.01143 Ptom.007G.01144
ortho-Coumaric acid	1_43464788	G/A	3.46014e-09	0.28798	0.2325		Ptom.001G.03802 Ptom.001G.03803
	3_14153376	T/A	6.31213e-08	0.216015	0.2257	Y	Ptom.003G.01650 Ptom.003G.01651
	3_14153368	T/C	1.07534e-07	0.208861	0.2149	Y	Ptom.003G.01650 Ptom.003G.01651
	3_14153382	C/T	1.11163e-07	0.20295	0.2137	Y	Ptom.003G.01650 Ptom.003G.01651
	3_14153364	C/T	1.11616e-07	0.192908	0.1972	Y	Ptom.003G.01650 Ptom.003G.01651
Salicylic Acid	13_12838091	C/G	6.48408e-08	0.186098	0.1858		Ptom.013G.01080 Ptom.013G.01081 Ptom.013G.01082
	6_8331234	A/G	1.36737e-07	0.101365	0.1019		Ptom.006G.01031 Ptom.006G.01032
	17_6360088	C/T	2.22811e-07	0.242118	0.2422		Ptom.017G.00569
Shikimate	3_15744352	C/A	1.89169e-08	0.211034	0.2086	Y	Ptom.003G.01748
	18_11032830	A/G	1.69522e-07	0.18148	0.1719		Ptom.018G.01137 Ptom.018G.01138
trans-Cinnamic acid	17_5553968	G/A	1.91924e-07	0.320254	0.2642	Y	Ptom.017G.00527
	10_4207472	C/T	2.33256e-07	0.243795	0.2028		Ptom.010G.00626 Ptom.010G.00627 Ptom.010G.00628 Ptom.010G.00629 Ptom.010G.00630

## Sheet: S4
Table S4 Detailed annotation information for candidate genes in GWAS and best blast with Populus trichocarpa and Arabidopsis thaliana
Gene_ID	Swiss_pro_annonation	Pfam_annotation	Best_blast_Ptri	Best_blast_Ath
Ptom.001G.02959	WAT1-related protein At5g64700 OS=Arabidopsis thaliana OX=3702 GN=At5g64700 PE=2 SV=1	EamA-like transporter family	Potri.001G307800	AT5G64700.1
Ptom.001G.03802	ABC transporter G family member 9 OS=Arabidopsis thaliana OX=3702 GN=ABCG9 PE=3 SV=2	ABC-2 type transporter	Potri.001G404000	AT4G27420.1
Ptom.001G.03803	NAC domain-containing protein 72 OS=Arabidopsis thaliana OX=3702 GN=NAC072 PE=2 SV=1	No apical meristem (NAM) protein	Potri.001G404100	AT4G27410.2
Ptom.002G.01749	#N/A	Acyclic terpene utilisation family protein AtuA	Potri.002G157400	AT1G01770.1
Ptom.002G.01750	DEAD-box ATP-dependent RNA helicase 8 OS=Arabidopsis thaliana OX=3702 GN=RH8 PE=2 SV=1	DEAD/DEAH box helicase	Potri.002G157500	AT4G00660.2
Ptom.003G.01650	Putative hydrolase C777.06c OS=Schizosaccharomyces pombe (strain 972 / ATCC 24843) OX=284812 GN=SPCC777.06c PE=4 SV=1	Beta-lactamase superfamily domain	Potri.003G036800	AT3G13800.1
Ptom.003G.01651	Protein indeterminate-domain 7 OS=Arabidopsis thaliana OX=3702 GN=IDD7 PE=2 SV=1	#N/A	Potri.003G040100	AT1G55110.1
Ptom.003G.01748	Homeobox-leucine zipper protein HOX4 OS=Oryza sativa subsp. japonica OX=39947 GN=HOX4 PE=1 SV=1	Homeobox domain	Potri.012G070900	AT3G01470.1
Ptom.005G.00523	GDP-mannose transporter GONST1 OS=Arabidopsis thaliana OX=3702 GN=GONST1 PE=1 SV=2	Triose-phosphate Transporter family	Potri.005G062900	AT2G13650.3
Ptom.006G.01031	WRKY DNA-binding transcription factor 70 OS=Solanum lycopersicum OX=4081 GN=WRKY70 PE=2 SV=1	WRKY DNA -binding domain	Potri.006G109100	AT3G56400.1
Ptom.006G.01032	Phospholipid-transporting ATPase 1 OS=Arabidopsis thaliana OX=3702 GN=ALA1 PE=2 SV=1	Phospholipid-translocating P-type ATPase C-terminal	Potri.006G109200	AT5G04930
Ptom.006G.01445	ATP-dependent 6-phosphofructokinase 3 OS=Arabidopsis thaliana OX=3702 GN=PFK3 PE=1 SV=1	Phosphofructokinase	Potri.006G152600	AT4G26270.1
Ptom.007G.01143	#N/A	#N/A	#N/A	#N/A
Ptom.007G.01144	Homeobox-DDT domain protein RLT2 OS=Arabidopsis thaliana OX=3702 GN=RLT2 PE=1 SV=1	Homeobox domain	Potri.007G135500	AT5G44180.1
Ptom.008G.01778	GATA transcription factor 15 OS=Arabidopsis thaliana OX=3702 GN=GATA15 PE=2 SV=2	GATA zinc finger	Potri.008G213900	AT3G06740.1
Ptom.010G.00626	Syntaxin-binding protein 5-like OS=Homo sapiens OX=9606 GN=STXBP5L PE=1 SV=2	Synaptobrevin	Potri.010G187700	AT5G05570
Ptom.010G.00627	Protein ESKIMO 1 OS=Arabidopsis thaliana OX=3702 GN=ESK1 PE=1 SV=1	PMR5 N terminal Domain	Potri.010G187600	AT3G55990
Ptom.010G.00628	Protein ESKIMO 1 OS=Arabidopsis thaliana OX=3702 GN=ESK1 PE=1 SV=1	GDSL/SGNH-like Acyl-Esterase family found in Pmr5 and Cas1p	Potri.010G187500	AT3G55990.1
Ptom.010G.00629	Protein ESKIMO 1 OS=Arabidopsis thaliana OX=3702 GN=ESK1 PE=1 SV=1	GDSL/SGNH-like Acyl-Esterase family found in Pmr5 and Cas1p	Potri.008G070000	AT3G55990
Ptom.010G.00630	Protein ESKIMO 1 OS=Arabidopsis thaliana OX=3702 GN=ESK1 PE=1 SV=1	PMR5 N terminal Domain	Potri.010G187300	AT3G55990
Ptom.010G.01912	Tuberculostearic acid methyltransferase UfaA1 OS=Mycobacterium tuberculosis (strain ATCC 25618 / H37Rv) OX=83332 GN=ufaA1 PE=1 SV=3	Mycolic acid cyclopropane synthetase	Potri.010G067900	AT3G23530.1
Ptom.012G.00656	Isochorismate synthase, chloroplastic OS=Catharanthus roseus OX=4058 PE=1 SV=1	#N/A	Potri.012G070000	AT1G74710.1
Ptom.013G.01080	50S ribosomal protein L18 OS=Coxiella burnetii (strain RSA 493 / Nine Mile phase I) OX=227377 GN=rplR PE=3 SV=1	Ribosomal L18 of archaea, bacteria, mitoch. and chloroplast	Potri.013G029300	AT1G08845.2
Ptom.013G.01081	B2 protein OS=Daucus carota OX=4039 PE=2 SV=1	Development and cell death domain	Potri.013G029200	AT2G32910.1
Ptom.013G.01082	Protein BONZAI 3 OS=Arabidopsis thaliana OX=3702 GN=BON3 PE=1 SV=1	C2 domain	Potri.013G029100	AT1G08860
Ptom.014G.01131	Solute carrier family 35 member F1 OS=Homo sapiens OX=9606 GN=SLC35F1 PE=2 SV=2	Solute carrier family 35	Potri.014G151800	AT3G59310.1
Ptom.014G.01369	Serine/threonine-protein kinase BSK2 OS=Arabidopsis thaliana OX=3702 GN=BSK2 PE=1 SV=1	Protein tyrosine kinase	Potri.014G179300	AT5G46570.1
Ptom.017G.00527	#N/A	#N/A	Potri.017G024400	#N/A
Ptom.017G.00569	#N/A	#N/A	Potri.017G031700	AT2G43320.2
Ptom.018G.01137	rRNA methyltransferase 1, mitochondrial OS=Schizosaccharomyces pombe (strain 972 / ATCC 24843) OX=284812 GN=mrm1 PE=3 SV=1	SpoU rRNA Methylase family	Potri.018G087800	AT2G19870.1
Ptom.018G.01138	#N/A	Glycosyl transferase family 21	Potri.018G087700	AT2G19880
Ptom.019G.00564	GDSL esterase/lipase At1g29670 OS=Arabidopsis thaliana OX=3702 GN=At1g29670 PE=2 SV=1	GDSL-like Lipase/Acylhydrolase	Potri.019G008300	AT1G29670.1
Ptom.019G.00565	GDSL esterase/lipase At1g29670 OS=Arabidopsis thaliana OX=3702 GN=At1g29670 PE=2 SV=1	GDSL-like Lipase/Acylhydrolase	Potri.019G008500	AT1G29670

## Sheet: S5
Table S5 Detailed information about the eQTLs identified for candidate genes in GWAS
expression gene	SNP_ID	P_value	mode of action	selective sweep	Reported gene
Ptom.001G.02959	1_37240992	9.21394e-09	trans		Ptom.001G.03357
	10_1104592	7.31085e-08	trans		Ptom.010G.00200 Ptom.010G.00201 Ptom.010G.00202 Ptom.010G.00203
	14_2157869	9.62124e-08	trans
	17_239424	2.13516e-07	trans
Ptom.001G.03803	10_16173819	5.72701e-08	trans	Y	Ptom.010G.02150 Ptom.010G.02151 Ptom.010G.02152 Ptom.010G.02153
	8_3125290	2.34723e-07	trans		Ptom.008G.00478 Ptom.008G.00479
	5_21155185	2.73392e-07	trans		Ptom.005G.02337 Ptom.005G.02339 Ptom.005G.02340 Ptom.005G.02341
Ptom.002G.01750	9_7008178	1.33101e-07	trans		Ptom.009G.00905 Ptom.009G.00906 Ptom.009G.00907 Ptom.009G.00908
Ptom.003G.01650	10_1104592	2.76248e-08	trans		Ptom.010G.00200 Ptom.010G.00201 Ptom.010G.00202 Ptom.010G.00203
	14_9888251	2.77066e-08	trans		Ptom.014G.01225
	1_5963034	7.19013e-08	trans		Ptom.001G.00655 Ptom.001G.00656 Ptom.001G.00657 Ptom.001G.00658
	1_5963041	7.41987e-08	trans		Ptom.001G.00655 Ptom.001G.00656 Ptom.001G.00657 Ptom.001G.00658
	3_9076048	9.01627e-08	trans		Ptom.003G.01189 Ptom.003G.01190 Ptom.003G.01191
	6_17195623	1.05359e-07	trans		Ptom.006G.01801 Ptom.006G.01802 Ptom.006G.01803
	18_3838683	1.98451e-07	trans		Ptom.018G.00363 Ptom.018G.00364 Ptom.018G.00365
	18_2047293	2.43055e-07	trans
	2_9027524	3.1606e-07	trans		Ptom.002G.01309 Ptom.002G.01310 Ptom.002G.01311 Ptom.002G.01312
Ptom.006G.01031	11_17000438	1.22319e-08	trans		Ptom.011G.01207 Ptom.011G.01209
	16_12032859	2.09889e-07	trans		Ptom.016G.00983 Ptom.016G.00984
	17_6340748	3.52054e-07	trans		Ptom.017G.00569
Ptom.006G.01032	3_17421942	2.66021e-09	trans
	2_3669871	6.53144e-09	trans		Ptom.002G.00590 Ptom.002G.00591 Ptom.002G.00592
	13_8376890	6.94583e-09	trans		Ptom.013G.00669 Ptom.013G.00670 Ptom.013G.00671
	7_2211115	3.10203e-08	trans		Ptom.007G.00302 Ptom.007G.00303 Ptom.007G.00304
	3_11385332	3.37755e-08	trans
	8_12570572	4.64464e-08	trans		Ptom.008G.01687
Ptom.006G.01445	3_2147828	3.00138e-07	trans		Ptom.003G.00264
Ptom.007G.01143	19_11313027	2.71679e-08	cis		Ptom.019G.00616 Ptom.019G.00617
	2_15794960	6.22323e-08	trans		Ptom.002G.02086
	19_11313039	1.33434e-07	cis		Ptom.019G.00616 Ptom.019G.00617
	1_22611886	2.15577e-07	trans		Ptom.001G.02068 Ptom.001G.02069 Ptom.001G.02070 Ptom.001G.02071 Ptom.001G.02072
	16_3085197	2.45362e-07	trans		Ptom.016G.00310 Ptom.016G.00311 Ptom.016G.00312
	19_11313008	3.2299e-07	cis		Ptom.019G.00616 Ptom.019G.00617
Ptom.008G.01778	4_15854698	1.77299e-07	trans		Ptom.004G.01577
Ptom.010G.00626	6_10240674	5.31806e-08	trans		Ptom.006G.01214 Ptom.006G.01215 Ptom.006G.01216
	6_10240669	7.27641e-08	trans		Ptom.006G.01214 Ptom.006G.01215 Ptom.006G.01216
Ptom.010G.01912	11_3628659	1.07697e-07	trans	Y	Ptom.011G.00308 Ptom.011G.00309 Ptom.011G.00308 Ptom.011G.00309
	4_12060195	1.865e-07	trans
	11_3628655	2.82756e-07	trans	Y	Ptom.011G.00308 Ptom.011G.00309
	19_5104589	2.84968e-07	trans
Ptom.013G.01080	18_3629999	1.12366e-07	trans		Ptom.018G.00332 Ptom.018G.00333 Ptom.018G.00334 Ptom.018G.00335
Ptom.013G.01081	17_3436947	3.08506e-08	trans
	1_5963034	7.20538e-08	trans		Ptom.001G.00655 Ptom.001G.00656 Ptom.001G.00657 Ptom.001G.00658
	15_2524019	8.58066e-08	trans		Ptom.015G.00227 Ptom.015G.00228
	10_1104592	2.39045e-07	trans		Ptom.010G.00200 Ptom.010G.00201 Ptom.010G.00202 Ptom.010G.00203
Ptom.014G.01131	15_10757699	2.72234e-08	trans		Ptom.015G.00928 Ptom.015G.00929 Ptom.015G.00930
	10_19228712	2.56453e-07	trans		Ptom.010G.02344 Ptom.010G.02345 Ptom.010G.02346 Ptom.010G.02347
	13_5262269	2.63835e-07	trans		Ptom.013G.00475
	15_5668983	3.507e-07	trans		Ptom.015G.00434
Ptom.014G.01369	6_17195623	2.06955e-08	trans		Ptom.006G.01801 Ptom.006G.01802 Ptom.006G.01803
	19_13881791	7.73285e-08	trans		Ptom.019G.00802
	19_4372201	8.07468e-08	trans		Ptom.019G.00367
	8_4341800	8.11621e-08	trans		Ptom.008G.00659 Ptom.008G.00660 Ptom.008G.00661 Ptom.008G.00662
	9_3375808	8.35075e-08	trans		Ptom.009G.00356 Ptom.009G.00357 Ptom.009G.00358
	18_10625431	8.68574e-08	trans		Ptom.018G.01121
	18_10625434	9.00804e-08	trans		Ptom.018G.01121
	5_9574321	9.05655e-08	trans		Ptom.005G.01162
	6_8017013	9.1346e-08	trans		Ptom.006G.00998 Ptom.006G.00999
	7_12087030	9.33502e-08	trans		Ptom.007G.01233
	4_11392023	9.66939e-08	trans		Ptom.004G.01159
	18_10625428	9.69479e-08	trans		Ptom.018G.01121
	9_3375811	1.00513e-07	trans		Ptom.009G.00356 Ptom.009G.00357 Ptom.009G.00358
	11_11931845	1.00819e-07	trans		Ptom.011G.00747 Ptom.011G.00748
	5_9574325	1.0104e-07	trans		Ptom.005G.01162
	4_9607181	1.01846e-07	trans		Ptom.004G.01036
	4_10132482	1.02808e-07	trans		Ptom.004G.01051
	4_14142893	1.04651e-07	trans		Ptom.004G.01407 Ptom.004G.01409 Ptom.004G.01410
	7_12087054	1.07104e-07	trans		Ptom.007G.01233
	7_12087024	1.08154e-07	trans		Ptom.007G.01233
	4_19004147	1.10462e-07	trans		Ptom.004G.01905 Ptom.004G.01906
	4_14142876	1.16088e-07	trans		Ptom.004G.01407 Ptom.004G.01409 Ptom.004G.01410
	4_10132484	1.18596e-07	trans		Ptom.004G.01051
	4_19004162	1.27901e-07	trans		Ptom.004G.01905 Ptom.004G.01906
	18_12016938	1.29451e-07	trans		Ptom.018G.01237 Ptom.018G.01238
	8_11670892	1.34217e-07	trans		Ptom.008G.01633 Ptom.008G.01635
	4_10543721	1.34268e-07	trans		Ptom.004G.01088 Ptom.004G.01089
Ptom.017G.00569	19_13851989	4.80175e-09	trans
	15_6115510	1.80766e-08	trans
	12_9308535	4.2982e-08	trans		Ptom.012G.00761 Ptom.012G.00762
	15_9523684	4.38614e-08	trans		Ptom.015G.00756
	16_13353521	7.25481e-08	trans		Ptom.016G.01184
	3_9624832	7.75555e-08	trans
	3_9624872	8.04223e-08	trans
	16_13353520	8.05904e-08	trans		Ptom.016G.01184
	16_13353528	8.14558e-08	trans		Ptom.016G.01184
	16_13353540	9.14648e-08	trans		Ptom.016G.01184
	7_1678948	9.4787e-08	trans		Ptom.007G.00239 Ptom.007G.00240 Ptom.007G.00241
	11_6292842	9.56381e-08	trans		Ptom.011G.00474 Ptom.011G.00475 Ptom.011G.00476
	19_7955489	9.79587e-08	trans
	16_10993382	1.01147e-07	trans		Ptom.016G.00921 Ptom.016G.00922 Ptom.016G.00923 Ptom.016G.00924
	5_11546330	1.02801e-07	trans		Ptom.005G.01319
	2_8639108	1.08828e-07	trans
	16_10993381	1.12236e-07	trans		Ptom.016G.00921 Ptom.016G.00922 Ptom.016G.00923 Ptom.016G.00924
	7_1678949	1.22229e-07	trans		Ptom.007G.00239 Ptom.007G.00240 Ptom.007G.00241
	6_12039776	1.25209e-07	trans		Ptom.006G.01389 Ptom.006G.01390
	19_4000579	1.25364e-07	trans		Ptom.019G.00334 Ptom.019G.00336

## Sheet: S6
Table S6 Detailed annotation information for candidate genes in eQTLs and best blast with Populus trichocarpa and Arabidopsis thaliana
Gene_ID	Swiss_pro_annonation	Pfam_annotation	Best_blast_Ptri	Best_blast_Ath
Ptom.001G.00655	Glycine--tRNA ligase, mitochondrial 1 OS=Arabidopsis thaliana OX=3702 GN=At1g29880 PE=1 SV=1	Anticodon binding domain	Potri.001G067800	AT1G29880
Ptom.001G.00656	Cytochrome b-c1 complex subunit Rieske-2, mitochondrial OS=Nicotiana tabacum OX=4097 PE=2 SV=1	Ubiquinol cytochrome reductase transmembrane region	Potri.001G067900	AT5G13430
Ptom.001G.00657	Phosphatidylinositol transfer protein 3 OS=Dictyostelium discoideum OX=44689 GN=pitC PE=2 SV=1	CRAL/TRIO domain	Potri.001G068000	AT1G01630
Ptom.001G.00658	Probable beta-1,4-xylosyltransferase IRX10 OS=Arabidopsis thaliana OX=3702 GN=IRX10 PE=2 SV=1	Exostosin family	Potri.001G068100	AT1G27440
Ptom.001G.02068	RING-H2 finger protein ATL57 OS=Arabidopsis thaliana OX=3702 GN=ATL57 PE=2 SV=1	Ring finger domain	Potri.001G212100	AT2G27940
Ptom.001G.02069	Probable histone H2B 4 OS=Caenorhabditis elegans OX=6239 GN=his-48 PE=3 SV=3	Core histone H2A/H2B/H3/H4	Potri.001G212200	AT1G08170
Ptom.001G.02070	#N/A	#N/A	Potri.001G212200	#N/A
Ptom.001G.02071	#N/A	#N/A	#N/A	#N/A
Ptom.001G.02072	Cyclin-dependent protein kinase inhibitor SMR3 OS=Arabidopsis thaliana OX=3702 GN=SMR3 PE=1 SV=1	#N/A	Potri.001G212300	AT5G02420
Ptom.001G.03357	Endoglucanase 11 OS=Arabidopsis thaliana OX=3702 GN=At2g32990 PE=2 SV=1	Glycosyl hydrolase family 9	Potri.001G356000	At2g32990
Ptom.002G.00590	F-box protein At2g27310 OS=Arabidopsis thaliana OX=3702 GN=At2g27310 PE=2 SV=1	#N/A	Potri.002G054500	AT2G27310
Ptom.002G.00591	F-box protein At3g44326 OS=Arabidopsis thaliana OX=3702 GN=At3g44326 PE=2 SV=1	#N/A	Potri.002G054500	AT3G44326
Ptom.002G.00592	Small nuclear ribonucleoprotein SmD1b OS=Arabidopsis thaliana OX=3702 GN=SMD1B PE=3 SV=1	LSM domain	Potri.002G054800	AT4G02840
Ptom.002G.01309	Putative cyclin-A3-1 OS=Arabidopsis thaliana OX=3702 GN=CYCA3-1 PE=3 SV=1	Cyclin, C-terminal domain	Potri.002G121500	AT1G47230
Ptom.002G.01310	Zinc finger protein 7 OS=Arabidopsis thaliana OX=3702 GN=ZFP7 PE=1 SV=1	#N/A	Potri.002G121600	AT1G24625
Ptom.002G.01311	#N/A	#N/A	Potri.002G121800	#N/A
Ptom.002G.01312	Cytochrome P450 81C13 OS=Catharanthus roseus OX=4058 GN=CYP81C13 PE=2 SV=1	Cytochrome P450	Potri.002G121900	AT5G10610
Ptom.002G.02086	#N/A	#N/A	Potri.002G192700	AT1G02380
Ptom.003G.00264	Pentatricopeptide repeat-containing protein At1g80270, mitochondrial OS=Arabidopsis thaliana OX=3702 GN=At1g80270 PE=2 SV=1	Pentatricopeptide repeat domain	Potri.003G193600	AT1G80270
Ptom.003G.01189	bZIP transcription factor 16 OS=Arabidopsis thaliana OX=3702 GN=BZIP16 PE=1 SV=1	Disordered region downstream of MFMR	Potri.003G097600	AT2G35530
Ptom.003G.01190	UV-B-induced protein At3g17800, chloroplastic OS=Arabidopsis thaliana OX=3702 GN=At3g17800 PE=2 SV=1	Protein of unknown function (DUF760)	Potri.003G097400	AT1G32160
Ptom.003G.01191	Probable xyloglucan endotransglucosylase/hydrolase protein 30 OS=Arabidopsis thaliana OX=3702 GN=XTH30 PE=2 SV=2	Glycosyl hydrolases family 16	Potri.003G097300	AT1G32170
Ptom.004G.01036	#N/A	#N/A	#N/A	#N/A
Ptom.004G.01051	Probable mitochondrial saccharopine dehydrogenase-like oxidoreductase At5g39410 OS=Arabidopsis thaliana OX=3702 GN=At5g39410 PE=1 SV=2	Saccharopine dehydrogenase NADP binding domain	Potri.004G126100	AT5G39410
Ptom.004G.01088	E3 ubiquitin-protein ligase MPSR1 OS=Arabidopsis thaliana OX=3702 GN=MPSR1 PE=1 SV=1	Ring finger domain	Potri.004G122000	AT1G26800
Ptom.004G.01089	DCN1-like protein 2 OS=Homo sapiens OX=9606 GN=DCUN1D2 PE=1 SV=1	Cullin binding	Potri.004G122100	AT3G28970
Ptom.004G.01159	#N/A	#N/A	#N/A	#N/A
Ptom.004G.01407	#N/A	#N/A	#N/A	#N/A
Ptom.004G.01409	DnaJ protein ERDJ2A OS=Arabidopsis thaliana OX=3702 GN=ERDJ2A PE=1 SV=1	Sec63 Brl domain	Potri.004G072200	AT1G79940
Ptom.004G.01410	#N/A	Tic22-like family	Potri.004G072100	AT5G62650
Ptom.004G.01577	Gibberellin 2-beta-dioxygenase OS=Phaseolus coccineus OX=3886 GN=GA2OX1 PE=2 SV=1	non-haem dioxygenase in morphine synthesis N-terminal	Potri.004G065000	AT1G30040
Ptom.004G.01905	ABC transporter C family member 12 OS=Arabidopsis thaliana OX=3702 GN=ABCC12 PE=2 SV=1	ABC transporter	Potri.004G034800	AT2G34660
Ptom.004G.01906	Anaphase-promoting complex subunit 4 OS=Arabidopsis thaliana OX=3702 GN=APC4 PE=2 SV=2	Anaphase-promoting complex subunit 4 WD40 domain	Potri.004G034900	AT4G21530
Ptom.005G.01162	#N/A	#N/A	#N/A	#N/A
Ptom.005G.01319	Cytochrome P450 81Q32 OS=Catharanthus roseus OX=4058 GN=CYP81Q32 PE=2 SV=1	Cytochrome P450	Potri.005G144000	AT5G36220
Ptom.005G.02337	Glutamate receptor 3.3 OS=Arabidopsis thaliana OX=3702 GN=GLR3.3 PE=2 SV=1	Receptor family ligand binding region	Potri.005G253800	AT1G42540
Ptom.005G.02339	Serine/threonine-protein kinase/endoribonuclease IRE1b OS=Arabidopsis thaliana OX=3702 GN=IRE1B PE=2 SV=1	Protein kinase domain	Potri.005G254000	AT5G24360
Ptom.005G.02340	Glyceraldehyde-3-phosphate dehydrogenase GAPB, chloroplastic OS=Arabidopsis thaliana OX=3702 GN=GAPB PE=1 SV=2	Glyceraldehyde 3-phosphate dehydrogenase, C-terminal domain	Potri.005G254100	AT1G42970
Ptom.005G.02341	#N/A	#N/A	Potri.005G254200	AT1G42960
Ptom.006G.00998	Short-chain dehydrogenase reductase 2a OS=Arabidopsis thaliana OX=3702 GN=SDR2a PE=3 SV=1	Enoyl-(Acyl carrier protein) reductase	Potri.006G105900	AT3G51680
Ptom.006G.00999	#N/A	#N/A	#N/A	#N/A
Ptom.006G.01214	NAC transcription factor ONAC010 OS=Oryza sativa subsp. indica OX=39946 GN=ONAC010 PE=3 SV=1	No apical meristem (NAM) protein	Potri.006G129400	AT1G61110
Ptom.006G.01215	Syntaxin-71 OS=Arabidopsis thaliana OX=3702 GN=SYP71 PE=1 SV=1	SNARE domain	Potri.006G129500	AT3G09740
Ptom.006G.01216	Polyubiquitin 3 OS=Arabidopsis thaliana OX=3702 GN=UBQ3 PE=2 SV=1	Ubiquitin family	Potri.006G129600	AT5G03240
Ptom.006G.01389	Mitogen-activated protein kinase kinase 2 OS=Arabidopsis thaliana OX=3702 GN=MKK2 PE=1 SV=2	Protein kinase domain	Potri.006G146500	AT4G29810
Ptom.006G.01390	#N/A	#N/A	Potri.006G146600	AT2G19390
Ptom.006G.01801	Probable carboxylesterase 15 OS=Arabidopsis thaliana OX=3702 GN=CXE15 PE=2 SV=1	alpha/beta hydrolase fold	Potri.006G198800	AT5G06570
Ptom.006G.01802	#N/A	#N/A	Potri.006G198900	#N/A
Ptom.006G.01803	Myosin-binding protein 7 OS=Arabidopsis thaliana OX=3702 GN=MYOB7 PE=1 SV=1	Zein-binding	Potri.006G199000	AT5G06560
Ptom.007G.00239	Syntaxin-112 OS=Arabidopsis thaliana OX=3702 GN=SYP112 PE=2 SV=2	SNARE domain	Potri.007G023100	AT2G18260
Ptom.007G.00240	Putative glucose-6-phosphate 1-epimerase OS=Cenchrus ciliaris OX=35872 PE=2 SV=1	Aldose 1-epimerase	Potri.007G023200	AT5G66530
Ptom.007G.00241	Laccase-2 OS=Oryza sativa subsp. japonica OX=39947 GN=LAC2 PE=2 SV=1	Multicopper oxidase	Potri.007G023300	AT5G03260
Ptom.007G.00302	Homeobox-leucine zipper protein ATHB-40 OS=Arabidopsis thaliana OX=3702 GN=ATHB-40 PE=2 SV=3	Homeobox domain	Potri.007G029500	AT4G36740
Ptom.007G.00303	Probable NAD(P)H dehydrogenase (quinone) FQR1-like 2 OS=Arabidopsis thaliana OX=3702 GN=At4g36750 PE=1 SV=1	NADPH-dependent FMN reductase	Potri.007G029600	AT4G36750
Ptom.007G.00304	Aminopeptidase P1 OS=Arabidopsis thaliana OX=3702 GN=APP1 PE=1 SV=1	Creatinase/Prolidase N-terminal domain	Potri.007G029700	AT4G36760
Ptom.007G.01233	#N/A	#N/A	#N/A	#N/A
Ptom.008G.00478	Sulfate transporter 4.1, chloroplastic OS=Arabidopsis thaliana OX=3702 GN=SULTR4;1 PE=1 SV=1	STAS domain	Potri.008G049500	AT5G13550
Ptom.008G.00479	#N/A	#N/A	#N/A	#N/A
Ptom.008G.00659	GDSL esterase/lipase CPRD49 OS=Arabidopsis thaliana OX=3702 GN=CPRD49 PE=2 SV=1	GDSL-like Lipase/Acylhydrolase family	Potri.008G068000	AT3G11210
Ptom.008G.00660	#N/A	#N/A	#N/A	#N/A
Ptom.008G.00661	Protein EARLY FLOWERING 4 OS=Arabidopsis thaliana OX=3702 GN=ELF4 PE=1 SV=1	Protein of unknown function (DUF1313)	Potri.008G068200	AT2G40080
Ptom.008G.00662	Phosphoinositide phospholipase C 6 OS=Arabidopsis thaliana OX=3702 GN=PLC6 PE=2 SV=2	Phosphoinositide-specific phospholipase C, efhand-like	Potri.008G068300	AT2G40116
Ptom.008G.01633	General transcription factor 3C polypeptide 2 OS=Homo sapiens OX=9606 GN=GTF3C2 PE=1 SV=2	#N/A	Potri.008G200900	AT1G19485
Ptom.008G.01635	Endo-1,3;1,4-beta-D-glucanase OS=Zea mays OX=4577 PE=1 SV=1	Dienelactone hydrolase family	Potri.008G201400	AT3G23600
Ptom.008G.01687	#N/A	#N/A	#N/A	#N/A
Ptom.009G.00356	ABC transporter G family member 15 OS=Arabidopsis thaliana OX=3702 GN=ABCG15 PE=2 SV=2	ABC transporter	Potri.009G051200	AT3G21090
Ptom.009G.00357	ABC transporter G family member 15 OS=Arabidopsis thaliana OX=3702 GN=ABCG15 PE=2 SV=2	ABC transporter	Potri.009G051300	AT3G21090
Ptom.009G.00358	Protein TRAUCO OS=Arabidopsis thaliana OX=3702 GN=TRO PE=1 SV=1	SPRY domain	Potri.009G051400	AT1G51450
Ptom.009G.00905	Probable 2-oxoglutarate-dependent dioxygenase At5g05600 OS=Arabidopsis thaliana OX=3702 GN=At5g05600 PE=2 SV=1	non-haem dioxygenase in morphine synthesis N-terminal	Potri.009G107400	AT3G19000
Ptom.009G.00906	Protein DMR6-LIKE OXYGENASE 1 OS=Arabidopsis thaliana OX=3702 GN=DLO1 PE=1 SV=1	2OG-Fe(II) oxygenase superfamily	Potri.009G107600	AT3G19000
Ptom.009G.00907	Protein DMR6-LIKE OXYGENASE 1 OS=Arabidopsis thaliana OX=3702 GN=DLO1 PE=1 SV=1	non-haem dioxygenase in morphine synthesis N-terminal	Potri.009G107700	AT3G19000
Ptom.009G.00908	#N/A	#N/A	Potri.009G107800	AT2G15860
Ptom.010G.00200	Pyruvate kinase 1, cytosolic OS=Oryza sativa subsp. japonica OX=39947 GN=Os11g0148500 PE=1 SV=1	Pyruvate kinase, barrel domain	Potri.010G233200	AT3G52990
Ptom.010G.00201	mRNA cap guanine-N7 methyltransferase 2 OS=Arabidopsis thaliana OX=3702 GN=At3g52210 PE=2 SV=1	mRNA capping enzyme	Potri.010G233100	AT3G52210
Ptom.010G.00202	Uncharacterized protein HI_0077 OS=Haemophilus influenzae (strain ATCC 51907 / DSM 11121 / KW20 / Rd) OX=71421 GN=HI_0077 PE=4 SV=1	Protein of unknown function (DUF455)	Potri.010G233000	AT5G04520
Ptom.010G.00203	3-phosphoinositide-dependent protein kinase 2 OS=Arabidopsis thaliana OX=3702 GN=PDPK2 PE=1 SV=1	PH domain	Potri.010G232800	AT3G10540
Ptom.010G.02150	Paired amphipathic helix protein Sin3-like 4 OS=Arabidopsis thaliana OX=3702 GN=SNL4 PE=3 SV=3	C-terminal domain of Sin3a protein	Potri.010G038700	AT1G70060
Ptom.010G.02151	#N/A	#N/A	#N/A	#N/A
Ptom.010G.02152	#N/A	Plant protein of unknown function (DUF936)	Potri.010G038600	AT1G23790
Ptom.010G.02153	DExH-box ATP-dependent RNA helicase DExH15 chloroplastic OS=Arabidopsis thaliana OX=3702 GN=ISE2 PE=1 SV=2	DEAD/DEAH box helicase	Potri.010G038500	AT1G70070
Ptom.010G.02344	60S ribosomal protein L22-2 OS=Arabidopsis thaliana OX=3702 GN=RPL22B PE=2 SV=1	Ribosomal L22e protein family	Potri.010G012700	AT3G05560
Ptom.010G.02345	Phylloplanin OS=Nicotiana tabacum OX=4097 PE=1 SV=1	#N/A	Potri.010G012400	AT3G16660
Ptom.010G.02346	#N/A	Endonuclease/Exonuclease/phosphatase family	#N/A	AT1G40390
Ptom.010G.02347	Phylloplanin OS=Nicotiana tabacum OX=4097 PE=1 SV=1	#N/A	Potri.010G012400	AT3G16660
Ptom.011G.00308	Universal stress protein PHOS32 OS=Arabidopsis thaliana OX=3702 GN=PHOS32 PE=1 SV=1	Universal stress protein family	Potri.011G039800	AT1G11360
Ptom.011G.00309	#N/A	#N/A	#N/A	#N/A
Ptom.011G.00474	Disease resistance protein RGA2 OS=Solanum bulbocastanum OX=147425 GN=RGA2 PE=1 SV=1	#N/A	Potri.011G005700	AT3G14460
Ptom.011G.00475	Disease resistance protein TAO1 OS=Arabidopsis thaliana OX=3702 GN=TAO1 PE=4 SV=1	#N/A	Potri.011G005900	AT1G69550
Ptom.011G.00476	#N/A	#N/A	Potri.011G006000	#N/A
Ptom.011G.00747	Probable protein phosphatase 2C 55 OS=Arabidopsis thaliana OX=3702 GN=At4g16580 PE=2 SV=2	Stage II sporulation protein E (SpoIIE)	Potri.011G013000	AT4G16580
Ptom.011G.00748	#N/A	#N/A	#N/A	#N/A
Ptom.011G.01207	Disease resistance protein RPM1 OS=Arabidopsis thaliana OX=3702 GN=RPM1 PE=1 SV=1	NB-ARC domain	Potri.011G165700	AT3G07040
Ptom.011G.01209	Subtilisin-like protease SBT5.3 OS=Arabidopsis thaliana OX=3702 GN=AIR3 PE=2 SV=1	Peptidase inhibitor I9	Potri.011G165900	AT2G04160
Ptom.012G.00761	#N/A	#N/A	#N/A	#N/A
Ptom.012G.00762	Protein ApaG OS=Magnetospirillum magneticum (strain AMB-1 / ATCC 700264) OX=342108 GN=apaG PE=3 SV=1	UvrB/uvrC motif	Potri.012G082300	#N/A
Ptom.013G.00475	Putative receptor protein kinase ZmPK1 OS=Zea mays OX=4577 GN=PK1 PE=2 SV=2	D-mannose binding lectin	Potri.013G095800	AT2G19130
Ptom.013G.00669	5'-3' exoribonuclease 3 OS=Arabidopsis thaliana OX=3702 GN=XRN3 PE=1 SV=1	-	Potri.013G070200	AT1G75660
Ptom.013G.00670	50S ribosomal protein L3, chloroplastic OS=Spinacia oleracea OX=3562 GN=RPL3 PE=1 SV=2	Ribosomal protein L3	Potri.013G070100	AT2G43030
Ptom.013G.00671	#N/A	#N/A	#N/A	#N/A
Ptom.014G.01225	Putative MO25-like protein At5g47540 OS=Arabidopsis thaliana OX=3702 GN=At5g47540 PE=2 SV=1	Mo25-like	Potri.014G162100	AT5G47540
Ptom.015G.00227	Uncharacterized protein At4g15970 OS=Arabidopsis thaliana OX=3702 GN=At4g15970 PE=2 SV=1	Nucleotide-diphospho-sugar transferase	Potri.015G029200	AT1G14590
Ptom.015G.00228	#N/A	Cell division control protein 14, SIN component	Potri.015G029300	AT4G27750
Ptom.015G.00434	Protein Dr1 homolog OS=Arabidopsis thaliana OX=3702 GN=DR1 PE=1 SV=1	Histone-like transcription factor (CBF/NF-Y) and archaeal histone	Potri.015G052800	AT5G23090
Ptom.015G.00756	Carbonic anhydrase, chloroplastic OS=Nicotiana tabacum OX=4097 PE=2 SV=1	Carbonic anhydrase	Potri.015G076000	AT3G01500
Ptom.015G.00928	Lysine histidine transporter 1 OS=Arabidopsis thaliana OX=3702 GN=LHT1 PE=1 SV=1	Transmembrane amino acid transporter protein	Potri.015G091600	AT5G40780
Ptom.015G.00929	Lysine histidine transporter 1 OS=Arabidopsis thaliana OX=3702 GN=LHT1 PE=1 SV=1	Transmembrane amino acid transporter protein	Potri.015G091600	AT5G40780
Ptom.015G.00930	Protein PLASTID TRANSCRIPTIONALLY ACTIVE 10 OS=Arabidopsis thaliana OX=3702 GN=PTAC10 PE=1 SV=1	#N/A	Potri.015G091700	AT3G48500
Ptom.016G.00310	60S ribosomal protein L21-2 OS=Arabidopsis thaliana OX=3702 GN=RPL21E PE=2 SV=1	Ribosomal protein L21e	Potri.016G061100	AT1G57660
Ptom.016G.00311	#N/A	S locus-related glycoprotein 1 binding pollen coat protein (SLR1-BP)	Potri.016G061300	#N/A
Ptom.016G.00312	Carbon catabolite repressor protein 4 homolog 1 OS=Arabidopsis thaliana OX=3702 GN=CCR4-1 PE=2 SV=1	zf-MYND-like zinc finger, mRNA-binding	Potri.016G061700	AT3G58560
Ptom.016G.00921	Protein DETOXIFICATION 44, chloroplastic OS=Arabidopsis thaliana OX=3702 GN=DTX44 PE=2 SV=1	MatE	Potri.016G126000	AT2G38330
Ptom.016G.00922	Dehydration-responsive element-binding protein 2A OS=Oryza sativa subsp. indica OX=39946 GN=DREB2A PE=3 SV=2	AP2 domain	Potri.016G126100	AT3G08780
Ptom.016G.00923	Probably inactive leucine-rich repeat receptor-like protein kinase IMK2 OS=Arabidopsis thaliana OX=3702 GN=IMK2 PE=1 SV=1	Protein tyrosine kinase	Potri.016G126300	AT3G51740
Ptom.016G.00924	PRA1 family protein B4 OS=Arabidopsis thaliana OX=3702 GN=PRA1B4 PE=1 SV=1	PRA1 family protein	Potri.016G126400	AT2G38360
Ptom.016G.00983	Cationic peroxidase 1 OS=Arachis hypogaea OX=3818 GN=PNC1 PE=1 SV=2	Peroxidase	Potri.016G132666	AT5G05340
Ptom.016G.00984	Cationic peroxidase 1 OS=Arachis hypogaea OX=3818 GN=PNC1 PE=1 SV=2	Peroxidase	Potri.016G132900	AT5G05340
Ptom.016G.01184	Putative MO25-like protein At5g47540 OS=Arabidopsis thaliana OX=3702 GN=At5g47540 PE=2 SV=1	Mo25-like	Potri.016G011100	AT5G47540
Ptom.017G.00569	#N/A	#N/A	Potri.017G031700	AT2G43320
Ptom.018G.00332	G-type lectin S-receptor-like serine/threonine-protein kinase SD2-5 OS=Arabidopsis thaliana OX=3702 GN=SD25 PE=1 SV=1	PAN-like domain	Potri.018G027300	AT4G32300
Ptom.018G.00333	Exocyst complex component SEC6 OS=Arabidopsis thaliana OX=3702 GN=SEC6 PE=1 SV=1	#N/A	Potri.T153700	AT1G71820
Ptom.018G.00334	#N/A	#N/A	Potri.018G027200	AT3G11760
Ptom.018G.00335	#N/A	#N/A	Potri.018G027100	AT4G32295
Ptom.018G.00363	Hydroxyproline O-galactosyltransferase HPGT2 OS=Arabidopsis thaliana OX=3702 GN=HPGT2 PE=1 SV=1	Galactosyltransferase	Potri.018G024500	AT4G32120
Ptom.018G.00364	Cell division cycle-associated 7-like protein OS=Homo sapiens OX=9606 GN=CDCA7L PE=1 SV=2	Zinc-finger domain of monoamine-oxidase A repressor R1	Potri.018G024400	AT5G38690
Ptom.018G.00365	Cysteine--tRNA ligase, chloroplastic/mitochondrial OS=Arabidopsis thaliana OX=3702 GN=SYCO PE=2 SV=1	tRNA synthetases class I (C) catalytic domain	Potri.018G024300	AT2G31170
Ptom.018G.01121	#N/A	#N/A	Potri.018G090000	AT5G57340
Ptom.018G.01237	Glucan endo-1,3-beta-glucosidase 8 OS=Arabidopsis thaliana OX=3702 GN=At1g64760 PE=2 SV=2	Glycosyl hydrolases family 17	Potri.018G077000	AT3G24330
Ptom.018G.01238	Syntaxin-32 OS=Arabidopsis thaliana OX=3702 GN=SYP32 PE=2 SV=1	SNARE domain	Potri.018G072400	AT3G24350
Ptom.019G.00334	#N/A	#N/A	Potri.019G078000	#N/A
Ptom.019G.00336	Protein FAM135B OS=Xenopus laevis OX=8355 GN=fam135b PE=2 SV=1	Protein FAM135	Potri.019G077700	AT1G58350
Ptom.019G.00367	Putative disease resistance protein RGA4 OS=Solanum bulbocastanum OX=147425 GN=RGA4 PE=2 SV=1	NB-ARC domain	Potri.019G074000	AT3G14470
Ptom.019G.00616	Fimbrin OS=Dictyostelium discoideum OX=44689 GN=fimA PE=2 SV=2	EF-hand domain pair	Potri.T056000	AT4G13440
Ptom.019G.00617	Fimbrin OS=Dictyostelium discoideum OX=44689 GN=fimA PE=2 SV=2	EF-hand domain pair	Potri.T056100	AT4G13440
Ptom.019G.00802	Transcription factor CSA OS=Oryza sativa subsp. japonica OX=39947 GN=CSA PE=2 SV=2	Myb-like DNA-binding domain	Potri.019G040900	AT1G26780

## Sheet: S7
Table S7 The distribution of candidate genes in co-expression module based on the whole data set of RNA-seq
module	the number of candidate gene	module size	the percentage of candidate genes in module (%)
blue	11	2241	0.49
brown	17	1898	0.9
cyan	3	182	1.65
darkgreen	2	731	0.27
darkgrey	2	306	0.65
darkorange	12	2243	0.53
darkred	5	505	0.99
darkturquoise	1	103	0.97
greenyellow	2	323	0.62
grey60	3	566	0.53
lightcyan	2	140	1.43
lightgreen	1	198	0.51
midnightblue	1	153	0.65
orange	2	308	0.65
purple	6	1461	0.41
royalblue	5	600	0.83
salmon	3	180	1.67
skyblue	6	1724	0.35
turquoise	4	730	0.55

## Sheet: S8
Table S8 Module membership of genes in each module obtained from WGCNA analysis
Gene_ID	module	MEblue	MEbrown	MEturquoise
AAO4	blue	-0.350267	-0.225591	-0.133949
Ptom.001G.00655	blue	0.087458	0.271183	0.12289
Ptom.001G.02068	blue	0.546872	-0.175215	0.214487
Ptom.001G.02072	blue	-0.0832499	0.300666	-0.164129
Ptom.001G.03803	blue	0.156368	-0.0846688	0.341058
Ptom.002G.00590	blue	0.323577	0.0827366	0.0316069
Ptom.002G.00591	blue	0.362666	0.177663	0.0924723
Ptom.002G.01312	blue	0.585046	0.143261	0.0962541
Ptom.002G.01750	blue	-0.495395	-0.336683	-0.30569
Ptom.003G.01191	blue	0.0180097	-0.0995021	0.321481
Ptom.003G.01651	blue	-0.187319	-0.269525	-0.398325
Ptom.004G.01088	blue	0.466179	0.225904	-0.0145111
Ptom.004G.01159	blue	0.238208	0.17992	0.241207
Ptom.004G.01409	blue	0.487239	0.127746	0.200108
Ptom.004G.01577	blue	0.0721601	-0.0297076	-0.387709
Ptom.004G.01906	blue	-0.224397	-0.267481	0.0506616
Ptom.005G.00523	blue	-0.34912	0.0192645	-0.354383
Ptom.005G.01162	blue	-0.155876	-0.104716	0.203012
Ptom.005G.02337	blue	-0.135145	0.0175578	0.398334
Ptom.005G.02340	blue	0.628852	0.163404	0.398907
Ptom.006G.01445	blue	0.135963	0.197239	0.35212
Ptom.007G.00239	blue	-0.112196	-0.138876	-0.110549
Ptom.007G.00240	blue	0.491811	0.347917	0.107039
Ptom.007G.00304	blue	0.325779	0.121623	0.191808
Ptom.008G.00479	blue	-0.113762	-0.0994838	-0.136344
Ptom.008G.00661	blue	0.0651652	0.195928	0.347174
Ptom.008G.00662	blue	-0.603579	-0.15107	-0.106786
Ptom.008G.01635	blue	0.397018	0.297136	-0.0989206
Ptom.008G.01778	blue	-0.16042	0.0986593	0.0696608
Ptom.009G.00356	blue	0.820093	0.209229	0.40807
Ptom.009G.00906	blue	0.228078	0.313146	-0.0391955
Ptom.009G.00907	blue	0.349048	0.184346	0.0324193
Ptom.009G.00908	blue	0.0194688	0.279735	0.051613
Ptom.010G.00200	blue	-0.550316	0.319709	-0.287394
Ptom.010G.00202	blue	-0.377352	-0.0693304	-0.263789
Ptom.010G.00626	blue	-0.400603	-0.563599	-0.264866
Ptom.010G.00630	blue	-0.197061	-0.0717549	0.149366
Ptom.010G.01912	blue	-0.488086	0.0393258	0.0225352
Ptom.011G.00308	blue	0.356892	-0.0258967	-0.00190753
Ptom.011G.00475	blue	0.800745	0.0103937	0.241015
Ptom.012G.00762	blue	0.38081	0.118317	0.115548
Ptom.013G.01080	blue	-0.402173	-0.0836309	-0.306113
Ptom.014G.01131	blue	-0.399679	-0.013767	-0.311025
Ptom.014G.01369	blue	-0.543579	0.140522	-0.403617
Ptom.015G.00227	blue	-0.423805	-0.00361853	-0.301978
Ptom.015G.00434	blue	0.370152	0.126535	0.079311
Ptom.015G.00756	blue	-0.320961	0.142828	0.171903
Ptom.016G.00983	blue	0.562299	0.398753	-0.116204
Ptom.016G.00984	blue	-0.0235945	0.0127194	-0.134112
Ptom.016G.01184	blue	0.577195	0.00698279	0.369372
Ptom.017G.00569	blue	0.60384	0.00536077	-0.115849
Ptom.018G.00333	blue	-0.052021	0.078392	-0.15049
Ptom.018G.00363	blue	0.384488	0.0528472	0.183031
Ptom.018G.00364	blue	0.139557	0.050261	-0.00180926
Ptom.018G.01121	blue	-0.0623418	0.0105658	0.285373
Ptom.018G.01138	blue	-0.300694	0.22719	-0.146171
Ptom.019G.00367	blue	-0.826455	-0.1962	-0.199458
Ptom.019G.00616	blue	-0.454823	0.0717975	-0.40419
Ptom.019G.00617	blue	-0.285761	0.107807	-0.395072
Ptom.019G.00802	blue	-0.159406	0.150952	-0.169942
Ptom.001G.00656	brown	0.13182	0.835089	-0.407496
Ptom.001G.00658	brown	0.0769989	0.486555	-0.0318696
Ptom.001G.02959	brown	-0.109823	0.457001	-0.47423
Ptom.002G.00592	brown	0.240241	0.579669	0.118563
Ptom.002G.01749	brown	0.164755	-0.648793	0.608953
Ptom.003G.01189	brown	-0.263764	-0.51398	-0.500545
Ptom.003G.01650	brown	-0.215271	-0.482859	0.0320164
Ptom.004G.01051	brown	0.0223133	0.621364	-0.493317
Ptom.006G.00999	brown	-0.177169	-0.587503	0.371586
Ptom.006G.01031	brown	0.0610814	0.30484	0.205239
Ptom.006G.01032	brown	-0.165134	-0.409566	0.247857
Ptom.006G.01215	brown	-0.286312	0.467474	0.122447
Ptom.006G.01390	brown	-0.438848	-0.893515	0.146444
Ptom.006G.01803	brown	-0.107821	-0.505622	-0.338762
Ptom.007G.00303	brown	-0.167224	0.548271	-0.132029
Ptom.007G.01143	brown	-0.372043	-0.545252	0.0496311
Ptom.007G.01144	brown	-0.349419	-0.861605	0.26958
Ptom.007G.01233	brown	-0.160297	-0.603314	-0.239553
Ptom.008G.00659	brown	-0.0702957	0.597207	-0.321665
Ptom.008G.00660	brown	-0.134366	0.431079	0.137199
Ptom.008G.01633	brown	-0.30668	-0.687089	0.392705
Ptom.009G.00358	brown	-0.234503	0.579906	-0.346669
Ptom.010G.00203	brown	-0.138825	-0.600611	0.210507
Ptom.010G.02150	brown	-0.22339	-0.629972	-0.0512195
Ptom.010G.02152	brown	0.115448	0.503666	-0.171131
Ptom.010G.02153	brown	0.094369	-0.347612	0.0531378
Ptom.010G.02344	brown	0.128323	0.696734	-0.201328
Ptom.011G.01209	brown	-0.248661	-0.71677	0.486443
Ptom.013G.00669	brown	-0.433149	-0.797267	0.00290126
Ptom.013G.00670	brown	0.433172	0.608439	0.151163
Ptom.015G.00228	brown	-0.0709047	0.584338	-0.593518
Ptom.016G.00310	brown	0.241662	0.67638	0.249081
Ptom.016G.00312	brown	-0.235518	-0.670383	-0.124968
Ptom.016G.00923	brown	0.168806	0.586321	-0.118541
Ptom.016G.00924	brown	-0.160782	0.756713	-0.552329
Ptom.018G.00335	brown	0.237388	0.430341	-0.148785
Ptom.018G.01238	brown	-0.101898	0.581685	-0.0492932
Ptom.019G.00334	brown	-0.0545291	0.391715	-0.362025
Ptom.019G.00336	brown	-0.254958	-0.887963	0.352533
EPS1	turquoise	-0.0391971	0.233686	0.437223
ICS	turquoise	0.11051	-0.35116	0.590951
Ptom.001G.00657	turquoise	-0.241775	0.319787	-0.71596
Ptom.003G.00264	turquoise	0.105193	-0.06243	0.729035
Ptom.003G.01190	turquoise	0.567636	0.0299576	0.810446
Ptom.004G.01089	turquoise	0.28305	0.381533	-0.549288
Ptom.004G.01407	turquoise	0.177687	-0.384661	0.842174
Ptom.004G.01410	turquoise	0.333123	-0.366003	0.688388
Ptom.004G.01905	turquoise	-0.0188464	-0.353893	-0.386463
Ptom.005G.02339	turquoise	-0.267876	-0.30291	0.409358
Ptom.005G.02341	turquoise	0.468608	0.248144	0.690519
Ptom.006G.01216	turquoise	-0.176317	0.228699	-0.731438
Ptom.006G.01389	turquoise	-0.388509	-0.0158396	-0.812077
Ptom.006G.01801	turquoise	-0.259971	0.427308	-0.600198
Ptom.008G.00478	turquoise	-0.266508	0.243903	-0.579548
Ptom.008G.01687	turquoise	0.53934	-0.0771324	0.726543
Ptom.010G.00201	turquoise	0.0722599	-0.145749	0.799479
Ptom.010G.00628	turquoise	0.411674	-0.147525	0.53251
Ptom.011G.00747	turquoise	0.024478	0.370225	-0.555974
Ptom.011G.01207	turquoise	-0.0346548	-0.373317	0.535308
Ptom.012G.00761	turquoise	-0.34648	0.341309	-0.665619
Ptom.013G.00475	turquoise	-0.366782	0.124765	-0.589799
Ptom.013G.00671	turquoise	-0.233127	-0.333659	0.327144
Ptom.013G.01081	turquoise	-0.563601	-0.169231	-0.58641
Ptom.015G.00930	turquoise	0.196665	-0.345043	0.678778
Ptom.016G.00921	turquoise	0.312604	-0.514579	0.598414
Ptom.016G.00922	turquoise	0.490478	0.165619	0.540658
Ptom.018G.00332	turquoise	-0.299903	-0.0759465	-0.717676
Ptom.018G.00334	turquoise	-0.419591	0.341102	-0.74953
Ptom.018G.00365	turquoise	0.318954	-0.212643	0.760718
Ptom.018G.01137	turquoise	0.282781	-0.0251676	0.844079

## Sheet: S9
Table S9 Correlations between gene expression modules and the contents of nine metabolites
Gene_ID	Module	Isochorismate		Benzaldehyde		ortho-Coumaric-acid		L-Phenylalanine		Benzoic-acid		trans-Cinnamic-acid		Shikimate		Salicylic-acid		Chorismate
		Pearson correlation	T-test	Pearson correlation	T-test	Pearson correlation	T-test	Pearson correlation	T-test	Pearson correlation	T-test	Pearson correlation	T-test	Pearson correlation	T-test	Pearson correlation	T-test	Pearson correlation	T-test
AAO4	blue	0.11918	0.23759	-0.11955	0.236127	0.125618	0.21301	-0.0161959	0.872934	-0.105869	0.294486	0.106773	0.290361	-0.0428691	0.671933	0.00774476	0.939041	0.0800812	0.428351
Ptom.001G.00655	blue	-0.139561	0.166097	0.0876991	0.385593	0.114138	0.258169	0.0430953	0.670303	0.0286044	0.777556	0.170893	0.0891365	0.166555	0.0976819	-0.165655	0.0995326	-0.186476	0.0632199
Ptom.001G.02068	blue	0.00292316	0.976973	-0.0621634	0.538942	-0.200386	0.0456089	-0.119417	0.236652	-0.0466178	0.645109	-0.270742	0.00644059	-0.318522	0.00123909	0.157594	0.117366	0.213373	0.0330468
Ptom.001G.02072	blue	-0.0498465	0.622363	-0.0301503	0.765871	0.0458477	0.650584	0.0552168	0.585312	-0.00488071	0.961562	0.182894	0.0685556	0.154635	0.124498	-0.182997	0.0683963	-0.189076	0.0595625
Ptom.001G.03803	blue	-0.0146753	0.884777	-0.0660642	0.513724	-0.0797528	0.430253	0.0965258	0.339398	-0.111944	0.267492	-0.133057	0.18693	0.0825192	0.41438	0.00899806	0.9292	0.0446756	0.658953
Ptom.002G.00590	blue	-0.0796368	0.430926	-0.0813403	0.421102	-0.0719257	0.477	0.0873994	0.387224	-0.137038	0.173963	-0.00667982	0.94741	0.0370701	0.714241	-0.0328113	0.745881	-0.0320562	0.751537
Ptom.002G.00591	blue	-0.101681	0.31411	-0.103019	0.307751	-0.16024	0.111259	-0.0335339	0.740481	-0.121539	0.228366	-0.137472	0.172593	-0.0425994	0.67388	-0.00568675	0.95522	0.0048824	0.961549
Ptom.002G.01312	blue	-0.109237	0.279306	0.0096068	0.924424	-0.195713	0.0510046	0.0555192	0.583256	-0.126493	0.209818	-0.090708	0.369437	-0.1122	0.266393	-0.0127611	0.899723	-0.00384123	0.969744
Ptom.002G.01750	blue	0.0880788	0.383531	-0.0709567	0.482972	0.156116	0.120888	-0.0616637	0.542216	-0.022225	0.826274	0.0932866	0.355928	0.0610481	0.546263	-0.0239927	0.812699	0.0225246	0.82397
Ptom.003G.01191	blue	0.026685	0.792133	0.1348	0.18117	0.0839859	0.406104	-0.0399901	0.69282	0.172052	0.0869552	-0.0976318	0.333867	0.0500392	0.621016	0.0167254	0.868816	0.0504662	0.618037
Ptom.003G.01651	blue	-0.043942	0.664212	0.0480633	0.634884	0.15722	0.118248	-0.0280307	0.781905	0.063548	0.529921	0.194236	0.0528163	0.126944	0.208181	-0.0121057	0.904848	0.0373904	0.71188
Ptom.004G.01088	blue	0.103715	0.304477	0.0804175	0.426407	-0.144293	0.15206	-0.0613274	0.544426	0.0865966	0.391617	-0.0842842	0.404433	-0.210358	0.0356673	0.221841	0.0265388	0.058341	0.564232
Ptom.004G.01159	blue	0.043119	0.670132	0.134087	0.18351	-0.0957994	0.343062	0.0102294	0.919542	0.101507	0.314942	-0.0201375	0.84237	0.0311862	0.75807	0.0633602	0.531141	-0.0321952	0.750495
Ptom.004G.01409	blue	-0.0312548	0.757554	0.0913243	0.36618	-0.165742	0.0993525	-0.00408878	0.967795	0.0664284	0.511401	-0.106081	0.293515	-0.200352	0.0456466	0.0938736	0.352896	0.100783	0.318426
Ptom.004G.01577	blue	0.114144	0.258144	-0.041123	0.684572	-0.0265189	0.793398	-0.130611	0.195236	-0.0516128	0.610066	-0.00643409	0.949342	-0.181004	0.0715145	0.153009	0.128556	0.171548	0.0878981
Ptom.004G.01906	blue	0.0286834	0.776958	0.0739749	0.464503	0.237831	0.0171857	0.00801758	0.936898	-0.0429438	0.671394	0.311058	0.00163267	0.239937	0.0161972	0.0985509	0.329314	0.1279	0.20475
Ptom.005G.00523	blue	0.250794	0.0118435	0.0489575	0.628592	0.107867	0.285416	-0.180442	0.0724139	0.0982697	0.330703	0.0299762	0.767185	-0.144674	0.150968	0.103657	0.304748	0.0494993	0.624792
Ptom.005G.01162	blue	-0.130345	0.196155	-0.119996	0.234372	0.104814	0.29935	0.047323	0.640112	-0.211923	0.0342861	0.123544	0.220725	0.11595	0.250639	-0.0653925	0.518023	-0.0709615	0.482942
Ptom.005G.02337	blue	-0.116415	0.248732	0.0965656	0.339198	-0.0708868	0.483404	0.085366	0.398406	0.0489023	0.628979	0.0803631	0.426722	0.133331	0.186015	-0.203595	0.0421854	-0.182391	0.0693326
Ptom.005G.02340	blue	-0.0861109	0.394288	-0.0155876	0.877669	-0.212124	0.0341119	-0.153287	0.127856	-0.111588	0.269028	-0.181385	0.0709092	-0.204455	0.0413057	0.136002	0.177273	0.0628832	0.534243
Ptom.006G.01445	blue	0.0998518	0.322939	0.106705	0.29067	0.200205	0.0458093	0.088499	0.381257	0.138726	0.168672	-0.0811598	0.422137	0.031297	0.757237	-0.0335581	0.740301	-0.0748433	0.459262
Ptom.007G.00239	blue	0.216958	0.0301434	0.0608607	0.547498	0.108461	0.282756	-0.0748744	0.459075	0.0864953	0.392173	-0.0477952	0.636775	-0.05836	0.564105	0.125386	0.213864	0.0343043	0.734738
Ptom.007G.00240	blue	-0.0130947	0.897115	-0.00668883	0.94734	-0.136409	0.175967	-0.0101423	0.920225	0.00244827	0.980713	-0.142222	0.158089	-0.185624	0.0644566	-0.0248775	0.805926	-0.0460988	0.648797
Ptom.007G.00304	blue	0.0730156	0.470331	-0.0836679	0.40789	-0.215806	0.0310519	-0.122298	0.22545	-0.0468028	0.643797	-0.289271	0.00351135	-0.248234	0.0127656	-0.0125885	0.901072	-0.00081861	0.993551
Ptom.008G.00479	blue	-0.0637942	0.528326	0.151183	0.133235	0.0496368	0.62383	0.0636251	0.529421	0.166923	0.096933	0.150403	0.135271	0.100281	0.320855	0.00143362	0.988706	-0.0445136	0.660113
Ptom.008G.00661	blue	0.122492	0.224712	0.179251	0.0743503	0.0258682	0.798358	-0.0313294	0.756994	0.0689557	0.495429	-0.0631156	0.532731	0.0113413	0.910831	0.0349378	0.730026	0.0133276	0.895296
Ptom.008G.00662	blue	0.27506	0.00561148	0.069144	0.49425	0.322525	0.00106555	-0.0415196	0.681694	0.00959255	0.924536	0.162623	0.105972	0.149944	0.136481	-0.0389861	0.700159	0.0592614	0.558091
Ptom.008G.01635	blue	0.207872	0.0379575	0.0370373	0.714483	-0.141242	0.161006	0.0159086	0.875169	-0.0889181	0.378997	-0.278425	0.00503275	-0.154094	0.125837	0.0424386	0.675041	0.118371	0.240812
Ptom.008G.01778	blue	0.229259	0.0217664	-0.0710937	0.482125	0.142262	0.157971	-0.121614	0.228078	0.0463705	0.646865	-0.0691518	0.494201	-0.114201	0.257906	0.0903985	0.37108	0.0458052	0.650887
Ptom.009G.00356	blue	-0.214377	0.0322108	-0.0200338	0.843171	-0.216427	0.0305594	0.159915	0.111995	-0.0263883	0.794392	-0.138123	0.17055	-0.0737945	0.465597	0.0453875	0.653865	0.0547216	0.588686
Ptom.009G.00906	blue	-0.088029	0.383801	0.057735	0.568293	0.0540134	0.593526	0.166484	0.0978269	0.120789	0.23127	-0.0500471	0.620961	0.138785	0.168488	-0.0642998	0.525056	-0.0908063	0.368917
Ptom.009G.00907	blue	-0.0830528	0.411358	0.176914	0.0782701	-0.0201721	0.842103	0.112899	0.263405	0.183197	0.0680906	-0.0409985	0.685477	0.0654458	0.517681	-0.0199781	0.843601	-0.0888501	0.379363
Ptom.009G.00908	blue	0.0700207	0.488778	-0.062217	0.538592	-0.156105	0.120915	-0.127172	0.207359	0.0426063	0.67383	-0.187011	0.0624527	-0.172955	0.0852882	-0.169358	0.092089	-0.143788	0.153513
Ptom.010G.00200	blue	0.0375014	0.711062	0.0270455	0.789389	0.102437	0.310504	0.0203341	0.840851	0.00415712	0.967257	0.203917	0.041854	0.132565	0.188578	-0.128948	0.201034	-0.0748166	0.459423
Ptom.010G.00202	blue	-0.0640749	0.526508	-0.0182714	0.856814	0.189097	0.0595331	0.174124	0.0831653	-0.0287631	0.776354	0.375922	0.000116047	0.266921	0.00726284	-0.102918	0.308227	-0.037687	0.709696
Ptom.010G.00626	blue	-0.0626124	0.536009	-0.0170499	0.866294	-0.0068667	0.945941	-0.0407477	0.6873	-0.0392356	0.698332	0.116768	0.247287	0.0927858	0.358527	-0.0348818	0.730442	0.0707662	0.484151
Ptom.010G.00630	blue	-0.142691	0.156707	0.0799745	0.428968	0.1834	0.0677793	0.121164	0.229813	0.00465933	0.963304	0.239953	0.01619	0.221614	0.0266977	0.0697531	0.490445	0.112407	0.265505
Ptom.010G.01912	blue	0.079053	0.434323	0.0690937	0.494564	0.216503	0.0304997	0.0836455	0.408016	0.0942213	0.351107	0.218132	0.0292412	0.0914154	0.3657	-0.144557	0.151304	-0.142946	0.155961
Ptom.011G.00308	blue	-0.0717145	0.478298	0.0732428	0.468947	-0.139729	0.165585	0.0544965	0.590223	0.00727555	0.942728	-0.0745181	0.461221	-0.00910847	0.928334	0.069689	0.490844	-3.97197e-05	0.999687
Ptom.011G.00475	blue	0.0985723	0.329209	-0.019732	0.845504	-0.228012	0.0225133	-0.143276	0.154999	-0.0304534	0.763586	-0.3885	6.4905e-05	-0.382923	8.42229e-05	0.166422	0.0979536	0.147847	0.142115
Ptom.012G.00762	blue	-0.129828	0.19795	0.013715	0.89227	-0.232903	0.0197051	-0.0891516	0.377741	-0.060069	0.55273	-0.129269	0.199903	-0.20626	0.039507	-0.0627505	0.535108	0.0102202	0.919614
Ptom.013G.01080	blue	0.183015	0.0683697	0.0286853	0.776943	0.164475	0.102001	-0.058138	0.565591	-0.148752	0.139662	0.18277	0.0687459	0.142631	0.156885	-0.129464	0.199221	-0.0824683	0.414669
Ptom.014G.01131	blue	-0.0061381	0.95167	0.0314064	0.756415	-0.0983216	0.330446	-0.0324534	0.74856	-0.0977863	0.333099	0.202262	0.0435813	0.0560404	0.57972	-0.174192	0.0830434	-0.0728496	0.471344
Ptom.014G.01369	blue	0.0228404	0.821542	-0.101801	0.313536	-0.0312134	0.757866	-0.136314	0.176272	-0.0953221	0.345483	0.119995	0.234375	0.0243835	0.809706	-0.139186	0.16725	-0.0526957	0.60258
Ptom.015G.00227	blue	0.0812949	0.421362	-0.0140495	0.889659	0.188126	0.0608781	-0.0836989	0.407716	-0.0418409	0.679365	0.214449	0.0321514	0.108068	0.284516	0.0581538	0.565485	-0.0121537	0.904472
Ptom.015G.00434	blue	0.12087	0.230955	-0.0386134	0.702891	-0.0595173	0.55639	-0.0315938	0.755007	0.0259154	0.797998	-0.172263	0.0865642	-0.112964	0.263131	0.0394153	0.697018	-0.00562455	0.955709
Ptom.015G.00756	blue	-0.0348793	0.730461	-0.116951	0.246545	0.407758	2.5442e-05	0.0796574	0.430807	0.0585743	0.562673	0.121882	0.227044	0.243839	0.0144949	-0.0854282	0.398062	-0.0781641	0.439524
Ptom.016G.00983	blue	0.0875851	0.386213	-0.0429849	0.671098	-0.199213	0.046917	-0.079781	0.43009	0.0797402	0.430326	-0.329228	0.000823876	-0.220532	0.0274668	0.0971213	0.336413	-0.0457609	0.651202
Ptom.016G.00984	blue	-0.0461224	0.648629	-0.0485696	0.631318	-0.0538325	0.594766	-0.142756	0.156518	-0.0940638	0.351917	0.0338286	0.738283	-0.0320493	0.751589	0.0330505	0.744093	0.0872487	0.388047
Ptom.016G.01184	blue	0.0886714	0.380326	0.0578131	0.567769	-0.217621	0.0296311	-0.0752788	0.456646	0.0599264	0.553675	-0.334244	0.000677035	-0.153879	0.126373	0.0916418	0.364509	0.0191715	0.849841
Ptom.017G.00569	blue	0.106441	0.29187	-0.124608	0.216742	-0.279884	0.00479869	-0.156009	0.121145	-0.111848	0.267904	-0.373788	0.000127774	-0.39382	5.03986e-05	0.1745	0.0824913	0.106763	0.290405
Ptom.018G.00333	blue	0.0873501	0.387493	0.0724534	0.473765	0.187222	0.062152	0.0754658	0.455525	0.0710849	0.48218	0.0419129	0.678844	0.0858267	0.395857	-0.0503468	0.618869	-0.0578054	0.56782
Ptom.018G.00363	blue	0.0542745	0.59174	-0.00820119	0.935456	-0.00387544	0.969475	0.00823335	0.935204	0.0830162	0.411564	-0.143002	0.155796	-0.155933	0.12133	0.137886	0.17129	0.0899588	0.373421
Ptom.018G.00364	blue	-0.0482228	0.633759	0.164526	0.101893	0.0196703	0.845981	0.118005	0.242281	0.184307	0.0664085	0.0406063	0.68833	0.0422365	0.676502	0.0889589	0.378778	-0.082409	0.415005
Ptom.018G.01121	blue	-0.128572	0.202362	-0.0942669	0.350873	-0.0729176	0.470929	0.00617941	0.951345	-0.0560252	0.579823	0.102654	0.309475	-0.0581897	0.565245	-0.0241655	0.811376	-0.0732716	0.468772
Ptom.018G.01138	blue	0.090873	0.368564	0.0217037	0.830287	0.138431	0.169587	-0.0250723	0.804436	0.0766582	0.448415	0.0996447	0.323948	-0.0395098	0.696327	-0.0536037	0.596335	-0.0828247	0.412648
Ptom.019G.00367	blue	0.140754	0.162472	-0.042329	0.675833	0.118442	0.240531	-0.0555891	0.582781	-0.0609078	0.547187	0.110629	0.273187	0.0348987	0.730317	0.000995316	0.992158	0.0940786	0.351841
Ptom.019G.00616	blue	0.196395	0.0501861	0.103073	0.307497	0.280925	0.0046376	0.101664	0.314188	0.137124	0.173691	0.263619	0.0080469	0.292213	0.00317707	0.0256385	0.800112	0.0773689	0.444206
Ptom.019G.00617	blue	0.136628	0.175268	0.0428738	0.671899	0.195816	0.0508799	0.0340574	0.736577	0.108955	0.280558	0.122554	0.224476	0.16332	0.104464	-0.0639552	0.527283	-0.111328	0.270151
Ptom.019G.00802	blue	-0.0909277	0.368274	-0.0250517	0.804594	-0.00627072	0.950627	0.0482307	0.633703	-0.0510537	0.613947	0.093186	0.356449	0.0211539	0.834524	-0.0298465	0.768163	-0.0165345	0.8703
Ptom.001G.00656	brown	-0.0100523	0.920931	-0.112631	0.264548	-0.173004	0.0851973	-0.0607219	0.548413	-0.117973	0.242408	-0.140256	0.163978	-0.0853065	0.398737	-0.068677	0.497178	-0.0876336	0.385948
Ptom.001G.00658	brown	-0.0792342	0.433267	-0.0480134	0.635235	0.146981	0.144492	0.223657	0.0252949	0.158306	0.115698	0.0741025	0.463731	0.0984823	0.329653	-0.0427235	0.672984	-0.0747939	0.45956
Ptom.001G.02959	brown	-0.0883773	0.381914	-0.0813455	0.421072	0.0575271	0.569689	0.197521	0.0488574	0.0949535	0.34736	0.0878864	0.384575	0.073843	0.465302	0.00593153	0.953295	-0.0659637	0.514366
Ptom.002G.00592	brown	0.0292113	0.772962	-0.045268	0.654718	-0.0725122	0.473405	-0.0501822	0.620017	0.027987	0.782237	-0.244272	0.0143162	-0.119661	0.235687	0.0365079	0.718391	-0.0216334	0.830828
Ptom.002G.01749	brown	0.0853996	0.39822	0.0839133	0.406512	-0.0510134	0.614227	-0.0342114	0.73543	0.0155281	0.878132	-0.149914	0.136562	-0.0723156	0.474608	0.00931722	0.926696	0.0414531	0.682176
Ptom.003G.01189	brown	0.0153923	0.879189	-0.0557503	0.581686	-0.0662972	0.512237	-0.13768	0.171936	-0.110215	0.274999	0.108657	0.281884	-0.0195309	0.847059	0.0820308	0.417157	0.128269	0.203436
Ptom.003G.01650	brown	0.0332511	0.742593	0.112691	0.264292	0.106522	0.291504	0.0698558	0.489805	0.168342	0.0940855	0.0774178	0.443917	0.057564	0.569441	0.0875992	0.386136	0.0676997	0.503333
Ptom.004G.01051	brown	-0.070209	0.487607	-0.0415768	0.681279	-0.0882381	0.382668	-0.0507183	0.61628	-0.0608605	0.547499	-0.0355388	0.725566	-0.0222429	0.826136	-0.0325203	0.748059	-0.0426179	0.673746
Ptom.006G.00999	brown	-0.0299804	0.767153	-0.0114467	0.910006	0.130469	0.195726	0.016503	0.870545	-0.0302671	0.76499	0.0909056	0.368391	0.0480568	0.634929	-0.0631297	0.532639	0.0364949	0.718487
Ptom.006G.01031	brown	0.0533522	0.598062	-0.094757	0.348363	0.0527669	0.602089	-0.18051	0.0723038	0.033615	0.739876	-0.199828	0.0462272	-0.0878925	0.384541	-0.0762631	0.450764	-0.0977543	0.333258
Ptom.006G.01032	brown	0.0264892	0.793624	-0.0745133	0.46125	-0.011204	0.911906	-0.0408884	0.686277	0.101932	0.312907	-0.0783358	0.438516	-0.00383051	0.969828	-0.010381	0.918354	0.025426	0.801734
Ptom.006G.01215	brown	-0.072332	0.474508	-0.0691464	0.494235	0.11339	0.261322	0.0220022	0.827989	0.0259918	0.797415	0.0694065	0.492608	0.0631611	0.532435	-0.167346	0.0960759	-0.165002	0.100893
Ptom.006G.01390	brown	-0.0136582	0.892714	0.0360631	0.721681	0.215421	0.0313606	0.00722704	0.943109	0.0324775	0.74838	0.183735	0.0672711	0.1621	0.107116	-0.0108921	0.914349	0.0728588	0.471288
Ptom.006G.01803	brown	0.0828896	0.412281	0.0396744	0.695124	-0.0365783	0.717871	-0.0855086	0.397616	-0.0309036	0.760196	0.0312881	0.757304	-0.0217108	0.830232	0.126975	0.208071	0.167505	0.0957577
Ptom.007G.00303	brown	0.0118691	0.9067	0.00165525	0.98696	0.116202	0.249603	-0.0157416	0.87647	0.164267	0.102441	0.0943294	0.350553	-0.0364775	0.718616	-0.0149101	0.882947	0.00749352	0.941015
Ptom.007G.01143	brown	-0.0707385	0.484322	0.120167	0.233699	0.255089	0.0104268	0.0603537	0.550846	0.142762	0.156501	0.149982	0.136381	0.263122	0.00817113	0.00381191	0.969975	0.147814	0.142203
Ptom.007G.01144	brown	-0.0582205	0.565039	0.0845576	0.402905	0.119896	0.234763	0.0436529	0.666289	0.01328	0.895667	0.184494	0.0661279	0.174294	0.0828594	-0.0114933	0.909641	0.0591775	0.55865
Ptom.007G.01233	brown	0.0737018	0.466158	-0.0419121	0.67885	-0.0138934	0.890878	-0.0496695	0.623601	-0.0148813	0.883172	0.0510907	0.61369	-0.091546	0.365013	0.144505	0.151452	0.183139	0.0681789
Ptom.008G.00659	brown	-0.0781516	0.439597	0.0382024	0.705907	0.149421	0.137871	0.0624548	0.537038	0.0805913	0.425406	0.175716	0.0803425	0.034659	0.732099	-0.0763042	0.450519	-0.0822935	0.415662
Ptom.008G.00660	brown	-0.0365137	0.718349	0.0125797	0.901141	0.0393906	0.697199	0.068088	0.500883	0.0201408	0.842344	0.0783437	0.43847	0.141511	0.160201	-0.102504	0.310189	-0.140291	0.163872
Ptom.008G.01633	brown	-0.00734944	0.942147	-0.0423196	0.675902	0.0699577	0.48917	-0.00875799	0.931084	-0.101355	0.315673	0.069243	0.49363	0.0194997	0.8473	-0.0576314	0.568988	0.0261228	0.796416
Ptom.009G.00358	brown	-0.0251096	0.804151	-0.23978	0.0162693	0.0630827	0.532944	-0.0762276	0.450975	-0.130558	0.195418	0.0164428	0.871013	-0.0163405	0.871809	-0.130833	0.19447	-0.181431	0.0708371
Ptom.010G.00203	brown	-0.169495	0.0918217	0.0671572	0.506768	-0.019692	0.845814	0.0912498	0.366573	0.0306708	0.761948	0.163488	0.104104	0.180641	0.0720933	0.0375558	0.710662	0.118917	0.238634
Ptom.010G.02150	brown	0.0716235	0.478858	0.0133744	0.89493	0.264575	0.00781256	0.0197276	0.845538	0.101595	0.31452	0.125455	0.213611	0.0733027	0.468583	0.0444783	0.660366	0.0615789	0.542773
Ptom.010G.02152	brown	-0.0760264	0.452174	-0.0602533	0.55151	0.0964553	0.339753	0.08351	0.408779	0.119335	0.236977	0.0349158	0.73019	-0.0356678	0.724609	-0.0460977	0.648804	-0.0814703	0.420358
Ptom.010G.02153	brown	0.0622529	0.538357	0.0587252	0.561665	0.277219	0.00523366	0.0904542	0.370784	0.141027	0.161651	0.0739459	0.464679	0.0627686	0.53499	0.0933585	0.355555	0.0231917	0.818844
Ptom.010G.02344	brown	0.0631068	0.532788	-0.208478	0.0373878	-0.188425	0.0604611	-0.190081	0.0581952	-0.230057	0.0213	-0.247372	0.01309	-0.196266	0.0503396	0.0958939	0.342584	0.009169	0.927859
Ptom.011G.01209	brown	-0.00287821	0.977327	0.0675927	0.50401	0.215691	0.0311438	0.0466401	0.644951	0.0639689	0.527195	0.120249	0.233379	0.119381	0.236793	-0.0206327	0.838545	-0.00240952	0.981018
Ptom.013G.00669	brown	0.105887	0.294405	0.0195662	0.846786	0.265052	0.00769788	-0.109928	0.276257	-0.00978962	0.92299	0.132011	0.190448	0.0921145	0.36203	0.0927035	0.358955	0.136231	0.176537
Ptom.013G.00670	brown	-0.133086	0.186833	0.0640833	0.526455	0.0881254	0.383278	0.211594	0.0345727	0.0840288	0.405864	0.0703852	0.486512	0.113166	0.262271	-0.0212184	0.834027	-0.0666289	0.510124
Ptom.015G.00228	brown	-0.0544919	0.590254	-0.0488608	0.629271	0.0135323	0.893697	-0.0294313	0.771299	0.0103798	0.918363	0.104423	0.301169	0.0468662	0.643347	-0.0310279	0.759261	-0.0613323	0.544393
Ptom.016G.00310	brown	0.0580358	0.566275	-0.0334828	0.740863	-0.0720933	0.475971	-0.085489	0.397725	0.0256237	0.800224	-0.247983	0.0128595	-0.185862	0.0641099	-0.0325188	0.748071	-0.0753344	0.456313
Ptom.016G.00312	brown	-0.00998821	0.921433	-0.00241126	0.981005	0.0102216	0.919603	0.016747	0.868648	-0.0569807	0.573366	0.115422	0.252818	0.0411007	0.684734	0.067478	0.504736	0.12598	0.211686
Ptom.016G.00923	brown	-0.00678072	0.946617	-0.00249632	0.980335	0.0914369	0.365587	0.116872	0.246863	0.0595371	0.556259	0.0447194	0.658639	-0.0363586	0.719495	0.0143057	0.88766	-0.0207024	0.838007
Ptom.016G.00924	brown	-0.0139662	0.890309	-0.12108	0.23014	-0.0371712	0.713495	-0.0282744	0.780057	-0.0069743	0.945096	0.0127101	0.900121	-0.0890182	0.378458	-0.112435	0.265387	-0.123603	0.220503
Ptom.018G.00335	brown	-0.0682143	0.500087	-0.0618585	0.540939	0.0165822	0.869929	0.119539	0.236169	0.0794581	0.431964	-0.0342324	0.735273	-0.106333	0.292364	0.0274244	0.786509	-0.0123202	0.90317
Ptom.018G.01238	brown	0.0655676	0.5169	0.0332148	0.742864	0.0447653	0.658311	0.0110377	0.913209	0.0984298	0.329912	0.0244501	0.809196	-0.0341708	0.735732	-0.167175	0.0964221	-0.167018	0.0967398
Ptom.019G.00334	brown	-0.00870513	0.931499	0.129844	0.197895	0.0124885	0.901854	0.129337	0.199666	0.0203559	0.840683	0.133618	0.185059	0.164299	0.102372	-0.0847489	0.401838	0.0217594	0.829858
Ptom.019G.00336	brown	-0.0507778	0.615866	0.0079018	0.937808	0.084495	0.403254	-0.0416503	0.680746	0.0354586	0.72616	0.0732682	0.468793	0.0500967	0.620614	0.00650012	0.948823	0.0657186	0.515933
EPS1	turquoise	-0.206891	0.0388942	0.0230809	0.819695	0.029036	0.774289	0.0332355	0.74271	0.202013	0.0438454	0.0356768	0.724542	0.0537849	0.595092	-0.0399894	0.692825	-0.0509747	0.614496
ICS	turquoise	-0.0624905	0.536805	0.184988	0.0653939	0.113568	0.260571	0.172262	0.0865649	0.190791	0.0572462	0.10049	0.319841	0.0578411	0.567581	0.0121805	0.904263	0.0482469	0.63359
Ptom.001G.00657	turquoise	-0.00015835	0.998752	0.0134583	0.894275	0.0235988	0.815719	0.00396265	0.968788	-0.00561949	0.955749	0.20097	0.0449695	0.159024	0.114034	-0.0186519	0.853865	-0.0179764	0.859101
Ptom.003G.00264	turquoise	0.0969083	0.337479	0.134906	0.180823	0.0387908	0.70159	-0.000683013	0.994619	0.0655825	0.516805	-0.079149	0.433763	0.00364318	0.971303	-0.130378	0.19604	-0.145519	0.148572
Ptom.003G.01190	turquoise	-0.146205	0.146647	0.1196	0.235929	-0.0551859	0.585522	0.184032	0.0668224	0.0699309	0.489337	-0.0979882	0.332097	0.031731	0.753977	-0.0424747	0.67478	-0.0177334	0.860987
Ptom.004G.01089	turquoise	0.140984	0.161778	-0.120309	0.233144	-0.0676457	0.503675	-0.03024	0.765195	0.0162654	0.872393	-0.105768	0.29495	-0.168079	0.0946079	0.0513375	0.611975	0.0667314	0.509472
Ptom.004G.01407	turquoise	-0.0554758	0.583551	0.174359	0.0827434	0.0810086	0.423005	0.0600209	0.553048	0.169424	0.0919611	-0.0362756	0.720109	0.00633986	0.950083	0.0057062	0.955067	-0.000511452	0.995971
Ptom.004G.01410	turquoise	-0.174727	0.0820875	0.0366824	0.717103	-0.00991754	0.921987	0.0948849	0.34771	-0.0712518	0.481149	0.0183148	0.856477	0.0572838	0.571325	-0.000330907	0.997393	-0.00694066	0.94536
Ptom.004G.01905	turquoise	0.0612849	0.544705	-0.0049135	0.961304	-0.115281	0.2534	-0.0934236	0.355219	-0.0423251	0.675862	-0.0988086	0.328045	-0.101347	0.315707	0.119633	0.235799	0.164229	0.102523
Ptom.005G.02339	turquoise	-0.0129072	0.89858	0.0238306	0.813942	0.0231293	0.819323	0.0959461	0.34232	-0.0157103	0.876713	0.0839195	0.406477	0.121665	0.227879	-0.130008	0.197324	-0.0756614	0.454355
Ptom.005G.02341	turquoise	-0.0872268	0.388166	0.100572	0.319445	-0.1805	0.0723196	-0.00550752	0.95663	-0.00423403	0.966652	-0.185573	0.0645315	-0.134989	0.180551	-0.0197174	0.845617	-0.0280876	0.781473
Ptom.006G.01216	turquoise	0.130097	0.197016	-0.131733	0.191392	-0.170421	0.0900357	-0.15569	0.121918	-0.132757	0.187933	-0.040794	0.686964	-0.174733	0.0820762	0.0462908	0.647432	-0.0270248	0.789547
Ptom.006G.01389	turquoise	0.0662561	0.512499	-0.10014	0.321535	-0.0151133	0.881364	-0.138057	0.170754	-0.0988374	0.327903	0.117522	0.244229	-0.0250923	0.804284	0.0595818	0.555962	0.109717	0.277188
Ptom.006G.01801	turquoise	0.0401939	0.691333	-0.0974374	0.334835	0.0366744	0.717161	0.00968389	0.92382	-0.0183	0.856592	0.160707	0.110206	-0.0263737	0.794504	-0.0844768	0.403356	-0.082738	0.413139
Ptom.008G.00478	turquoise	0.0332065	0.742926	0.0975982	0.334034	-0.0171677	0.865379	0.106554	0.291356	0.000826856	0.993486	0.27791	0.00511771	0.105423	0.296538	0.0342096	0.735443	0.0201514	0.842262
Ptom.008G.01687	turquoise	-0.0793945	0.432334	0.166887	0.0970052	-0.0522506	0.605652	0.20131	0.0446009	0.12649	0.209829	0.024822	0.806351	0.0170612	0.866206	0.0200156	0.843312	-0.0101177	0.920418
Ptom.010G.00201	turquoise	0.0177488	0.860868	0.0335659	0.740242	-0.0377274	0.709399	-0.0104513	0.917803	-0.0362764	0.720103	-0.112556	0.264869	-0.022116	0.827113	-0.0887056	0.380142	-0.0791535	0.433737
Ptom.010G.00628	turquoise	-0.0680151	0.501342	0.183746	0.0672534	-0.0697777	0.490291	0.213297	0.0331106	0.12256	0.224449	-0.0210899	0.835018	-0.0239613	0.81294	0.100194	0.321274	0.129789	0.198087
Ptom.011G.00747	turquoise	0.148361	0.140719	-0.01454	0.885833	-0.196566	0.0499828	-0.0701095	0.488225	0.0534973	0.597065	-0.0785436	0.437299	-0.206147	0.0396182	0.228669	0.0221175	0.1267	0.209067
Ptom.011G.01207	turquoise	-0.116421	0.248706	0.0255376	0.800881	-0.104979	0.298586	-0.0380191	0.707254	-0.116688	0.247616	-0.00873365	0.931276	0.0929934	0.357448	-0.0940916	0.351774	-0.0168039	0.868206
Ptom.012G.00761	turquoise	0.0691494	0.494216	-0.0783361	0.438515	-0.0841483	0.405194	-0.0263682	0.794546	-0.084598	0.402679	0.124747	0.216227	-0.0232299	0.818551	-0.0500789	0.620739	-0.0183686	0.85606
Ptom.013G.00475	turquoise	0.0325771	0.747634	-0.0774118	0.443953	0.183813	0.0671524	-0.0395231	0.69623	0.0934442	0.355112	0.15272	0.129288	0.00405304	0.968076	-0.0675885	0.504036	-0.00767689	0.939574
Ptom.013G.00671	turquoise	0.134763	0.18129	0.0170812	0.866051	0.0292413	0.772735	-0.128059	0.204183	-0.116908	0.246719	-0.0923378	0.360863	0.00624602	0.950821	0.0529037	0.601147	0.116462	0.248538
Ptom.013G.01081	turquoise	0.14316	0.155337	-0.00980534	0.922867	0.27762	0.00516616	-0.0193729	0.848282	-0.0118343	0.906972	0.13595	0.17744	0.202553	0.0432731	-0.0611438	0.545633	-0.040345	0.690232
Ptom.015G.00930	turquoise	-0.0470632	0.641951	0.0638918	0.527693	0.152648	0.129472	0.048341	0.632927	-0.0582664	0.564731	0.0352941	0.72738	0.142411	0.157533	-0.0730667	0.47002	-0.0661764	0.513008
Ptom.016G.00921	turquoise	-0.12718	0.207331	0.133836	0.184337	-0.0506022	0.617089	-0.0169424	0.86713	0.0954667	0.344748	-0.0621653	0.53893	-0.0596285	0.555651	0.0471736	0.641169	0.0899359	0.373543
Ptom.016G.00922	turquoise	-0.0224037	0.824899	0.0525677	0.603463	-0.154985	0.123637	0.0822621	0.415841	-0.0794946	0.431752	-0.229248	0.0217733	-0.0148807	0.883176	0.081555	0.419873	0.0487497	0.630051
Ptom.018G.00332	turquoise	0.113052	0.262755	-0.0395566	0.695985	0.140829	0.162245	-0.08174	0.418816	0.0629872	0.533566	0.108404	0.28301	-0.0530602	0.600069	0.061216	0.545158	0.0748853	0.45901
Ptom.018G.00334	turquoise	0.0573173	0.5711	-0.0360258	0.721957	0.0881956	0.382897	0.0351083	0.728759	0.0419407	0.678642	0.171805	0.0874171	0.111815	0.268047	-0.0493343	0.625948	-0.049135	0.627346
Ptom.018G.00365	turquoise	-0.0566103	0.575865	0.0687209	0.496902	-0.0290284	0.774346	0.107638	0.286449	-0.0513086	0.612176	-0.114097	0.258343	-0.0552807	0.584877	-0.0806254	0.425209	-0.0713442	0.480579
Ptom.018G.01137	turquoise	-0.109083	0.279989	0.109189	0.279521	0.115754	0.251443	0.157169	0.118371	0.0477694	0.636957	-0.0211399	0.834632	0.0754961	0.455344	-0.0405168	0.688981	-0.0632443	0.531894

## Sheet: S10
Table S10 Nine metabolic traits involving in SA biosynthesis of P .tomentosa
Accessions	Isochorismate	Benzaldehyde	ortho-Coumaric acid	L-Phenylalanine	Benzoic acid	trans-Cinnamic acid	Shikimate	Salicylic Acid	Chorismate
Pto001	486000	642000	2450000	1683000	1650000	66200	5260000	1660000	356000
Pto002	516000	1076000	1776000	632000	3431000	24800	789000	5308000	866000
Pto003	390000	497000	455000	699000	2172000	10000	325000	3339000	683000
Pto004	437000	605000	755000	547000	1458000	4600	167000	5123000	979000
Pto005	377000	578000	1573000	829000	908000	2900	996000	7552000	1583000
Pto006	486000	645000	2447000	1679000	1650000	66100	5260000	1661000	357000
Pto007	242000	990000	1016000	1829000	6916000	237000	5618000	2629000	675000
Pto008	508000	452000	810000	570000	675000	NA	165000	5268000	919000
Pto009	344000	500000	1507000	739000	792000	7300	2118000	3310000	641000
Pto010	297000	444000	943000	956000	893000	8400	938000	7872000	1281000
Pto011	550000	548000	606000	588000	1074000	6700	284000	10739000	1271000
Pto012	338000	383000	603000	693000	700000	14700	1803000	7438000	1163000
Pto013	502000	427000	1106000	715000	600000	NA	159000	8435000	920000
Pto014	371000	569000	1550000	817000	895000	2840	981000	7440000	1560000
Pto015	455000	613000	995000	763000	1803000	21900	1734000	7350000	1064000
Pto016	411000	1081000	852000	2092000	1512000	26400	6520000	7718000	1320000
Pto017	545000	847000	1310000	672000	1370000	28500	1100000	2230000	429000
Pto018	796000	511000	1025000	623000	663000	17400	495000	7044000	1117000
Pto019	490000	820000	1685000	887000	1567000	58000	1576000	4522000	908000
Pto020	800000	563000	1261000	787000	1530000	22010	941000	10400000	1548000
Pto021	301000	372000	1547000	836000	863000	8600	2246000	12315000	1714000
Pto022	382000	730000	1180000	1020000	2110000	27800	1660000	8520000	1170000
Pto023	493000	438000	786000	554000	655000	NA	161000	5113000	892000
Pto024	437000	732000	1370000	564000	756000	46500	1680000	6210000	1080000
Pto025	306000	378000	1570000	849000	876000	8680	2280000	12500000	1740000
Pto026	240000	991000	1010000	1830000	6930000	236000	5620000	2630000	676000
Pto027	553000	860000	1330000	682000	1391000	28900	1117000	2263000	435000
Pto028	404000	786000	1238000	910000	2629000	14200	777000	3258000	1208000
Pto029	688000	279000	1790000	480000	369000	3510	413000	7090000	1821000
Pto030	318000	627000	475000	693000	1614000	7000	433000	5075000	1147000
Pto031	437000	479000	603000	687000	2365000	4600	222000	13500000	1543000
Pto032	348000	395000	621000	714000	721000	15100	1857000	7663000	1198000
Pto033	488000	561000	1773000	805000	677000	4800	1557000	3054000	542000
Pto034	281000	475000	1086000	796000	637000	50000	2050000	5298000	915000
Pto035	413000	1080000	853000	2090000	1509000	26300	6517000	7721000	1318000
Pto036	360000	445000	1202000	761000	593000	12700	1616000	2118000	829000
Pto037	336000	478000	889000	672000	1070000	8740	2060000	3380000	941000
Pto038	254000	775000	919000	1310000	824000	47700	2660000	3670000	879000
Pto039	403000	500000	581000	520000	921000	NA	233000	4830000	1510000
Pto040	281000	500000	1113000	985000	1419000	14600	2552000	8355000	1232000
Pto041	658000	818000	1939000	666000	1208000	19300	1035000	8282000	1380000
Pto042	365000	265000	866000	738000	654000	6290	1310000	4520000	756800
Pto043	366000	638000	834000	755000	1391000	6600	248000	7572000	928000
Pto044	289000	516000	1147000	1015000	1462000	15000	2629000	8607000	1269000
Pto045	398000	430000	544000	540000	772000	6900	357000	7744000	1133000
Pto046	384000	630000	2020000	1140000	3310000	30200	3310000	4430000	926000
Pto047	802000	562000	1260000	792000	1531000	21980	937000	10400000	1550000
Pto048	490000	666000	890000	1034000	1626000	23700	3409000	4837000	1163000
Pto049	330000	720000	690000	709000	2200000	21200	415000	6420000	1040000
Pto050	598000	1230000	1290000	732000	4760000	43600	1111000	3326000	549000
Pto051	469000	631000	1025000	786000	1857000	22500	1786000	7572000	1096000
Pto052	401000	780000	1182000	561000	2857000	28100	758000	3015000	401000
Pto053	511000	512000	1429000	431000	1310000	13300	348000	6906000	857000
Pto054	340000	669000	808000	724000	1670000	22900	1320000	23295000	2527000
Pto055	349000	692000	1448000	560000	1744000	19200	928000	5498000	859000
Pto056	345000	995000	1222000	1724000	2926000	35600	6286000	15369000	1911000
Pto057	487000	767000	1390000	1430000	1630000	25900	2260000	6500000	1440000
Pto058	415000	535000	1258000	423000	992000	11210	230000	3070000	954000
Pto059	438000	814000	1005000	1015000	1624000	12800	619000	9013000	1238000
Pto060	603000	771000	1143000	976000	2158000	24000	2010000	3842000	846000
Pto061	314000	804000	1840000	652000	3810000	32100	470000	5540000	1600000
Pto062	471000	668000	940000	581000	1888000	5600	410000	14210000	1330000
Pto063	306000	458000	971000	985000	920000	8700	966000	8110000	1320000
Pto064	326000	838000	1060000	686000	3100000	37600	1030000	4270000	827000
Pto065	532000	475000	593000	901000	418000	4800	312000	2345000	538000
Pto066	397000	493000	572000	512000	907000	NA	230000	4759000	1488000
Pto067	516000	625000	1462000	458000	1472000	7800	474000	4527000	874000
Pto068	470000	630000	1160000	593000	1290000	15100	956000	8890000	1120000
Pto069	598000	496000	1090000	679000	1010000	NA	346000	14800000	1120000
Pto070	373000	656000	887000	456000	1720000	34800	1070000	5070000	1260000
Pto071	372000	347000	967000	967000	611000	9860	2430000	3630000	652000
Pto072	413000	368000	975000	481000	539000	4000	256000	12217000	1724000
Pto073	532000	705000	1379000	863000	1015000	2700	1320000	7793000	1192000
Pto074	614000	511000	1512000	462000	920000	8800	210000	7389000	1117000
Pto075	641000	1137000	1654000	676000	4009000	26100	554000	9145000	1431000
Pto076	444000	593000	851000	NA	1153000	27000	2650000	16847000	1734000
Pto077	337000	613000	510000	626000	1143000	3400	373000	3931000	775000
Pto078	384000	490000	448000	689000	2140000	9850	320000	3290000	673000
Pto079	596000	496000	1468000	448000	893000	8500	204000	7172000	1084000
Pto080	319000	816000	1868000	662000	3867000	32600	477000	5623000	1624000
Pto081	410000	443000	560000	556000	796000	7100	367000	7978000	1167000
Pto082	339000	514000	1010000	708000	1490000	22000	1260000	4220000	717000
Pto083	494000	779000	1411000	1451000	1654000	26300	2294000	6598000	1462000
Pto084	341000	592000	1133000	634000	2433000	15100	323000	3005000	583000
Pto085	392000	763000	1202000	884000	2552000	13800	755000	3163000	1172000
Pto086	310000	669000	1090000	745000	1660000	33400	1380000	2690000	569000
Pto087	222000	537000	1250000	1100000	1410000	55400	1300000	4700000	1300000
Pto088	504000	686000	917000	1066000	1675000	24500	3512000	4984000	1198000
Pto089	400000	1132000	1400000	2859000	1870000	43100	2860000	5399000	1257000
Pto090	488000	641000	2453000	1678000	1650000	66310	5259000	1664000	356000
Pto091	364000	263000	869000	736000	653000	6290	1310000	4518000	757100
Pto092	313000	605000	546000	649000	1468000	3200	177000	3153000	1291000
Pto093	419000	749000	1969000	1583000	2812000	118800	5461000	5978000	1096000
Pto094	512000	523000	805000	691000	1590000	2510	154000	4860000	1529000
Pto095	409000	1080000	852000	2089000	1509000	26500	6519000	7722000	1321000
Pto096	365000	452000	1220000	772000	602000	12900	1640000	2150000	841000
Pto097	282000	532000	1147000	953000	1198000	90600	1380000	4791000	970000
Pto098	398000	774000	1220000	897000	2590000	14000	766000	3210000	1190000
Pto099	240000	990000	1010000	1830000	6930000	237000	5620000	2630000	675000
Pto100	321000	826000	1044000	676000	3054000	37000	1015000	4207000	815000
Pto101	367000	342000	953000	953000	602000	9700	2394000	3576000	642000
Pto102	317000	640000	951000	691000	1157000	23000	1360000	5359000	1462000
Pto103	409000	508000	590000	528000	935000	NA	236000	4902000	1533000
Pto104	689000	280000	1790000	478000	368000	3520	412000	7100000	1818000
Pto105	423000	799000	1261000	901000	754000	53000	1340000	6049000	1084000
Pto106	488000	734000	841000	1409000	1172000	131000	3379000	11626000	1773000
Pto107	607000	503000	1106000	689000	1025000	NA	351000	15022000	1137000
Pto108	339000	911000	1050000	1200000	1490000	146000	1430000	6560000	960000
Pto109	462000	340000	1380000	674000	458000	14200	1040000	10100000	1560000
Pto110	250000	764000	905000	1291000	812000	47000	2621000	3616000	866000
Pto111	451000	602000	864000	NA	1170000	27400	2690000	17100000	1760000
Pto112	378000	621000	1990000	1123000	3261000	29800	3261000	4365000	912000
Pto113	598000	1229000	1340000	739000	4760000	44100	1109000	3300000	549000
Pto114	334000	898000	1034000	1182000	1468000	143800	1409000	6463000	946000
Pto115	349000	507000	1530000	750000	804000	7380	2150000	3360000	651000
Pto116	301000	451000	957000	970000	906000	8530	952000	7990000	1300000
Pto117	495000	421000	1090000	704000	591000	NA	157000	8310000	906000
Pto118	305000	659000	1074000	734000	1635000	32900	1360000	2650000	561000
Pto119	444000	743000	1391000	572000	767000	47200	1705000	6303000	1096000
Pto120	279000	475000	860000	641000	727000	29400	1280000	1870000	605000
Pto121	242000	851000	1100000	1030000	2860000	58400	884000	3790000	846000
Pto122	238000	838000	1084000	1015000	2818000	57500	871000	3734000	833000
Pto123	407000	792000	1200000	569000	2900000	28500	769000	3060000	407000
Pto124	591000	764000	1746000	917000	1431000	15600	1857000	1685000	574000
Pto125	311000	384000	1594000	862000	889000	8800	2314000	12688000	1766000
Pto126	354000	702000	1470000	568000	1770000	19500	942000	5580000	872000
Pto127	500000	445000	798000	562000	665000	NA	163000	5190000	905000
Pto128	465000	600000	1147000	1523000	1320000	10200	944000	6851000	1117000
Pto129	419000	382000	1050000	756000	577000	5490	1090000	10200000	1190000
Pto130	458000	611000	877000	NA	1188000	27800	2730000	17357000	1786000
Pto131	390000	639000	2050000	1157000	3360000	30700	3360000	4496000	940000
Pto132	308000	609000	461000	673000	1567000	6800	421000	4926000	1113000
Pto133	632000	1120000	1630000	666000	3950000	25700	546000	9010000	1410000
Pto134	432000	426000	752000	547000	798000	2130	167000	10890000	1520000
Pto135	413000	530000	1259000	422000	993000	11220	238000	3070000	954000
Pto136	344000	522000	1025000	719000	1512000	22300	1279000	4283000	728000
Pto137	753000	797000	1310000	685000	1470000	5640	448000	14300000	1820000
Pto138	497000	676000	903000	1050000	1650000	24100	3460000	4910000	1180000
Pto139	325000	709000	680000	699000	2167000	20900	409000	6325000	1025000
Pto140	540000	482000	602000	915000	424000	4860	317000	2380000	546000
Pto141	489000	1088000	292000	605000	1322000	3390	405000	1990000	743000
Pto142	498000	706000	1570000	570000	1540000	13200	571000	6980000	1530000
Pto143	502000	578000	1827000	829000	697000	4900	1604000	3147000	558000
Pto144	385000	379000	1020000	597000	525000	9710	456000	6010000	619000
Pto145	689000	279000	1789000	480000	366000	3520	411000	7100000	1823000
Pto146	801000	567000	1260000	791000	1530000	21990	942000	10399000	1550200
Pto147	548000	489000	611000	929000	430000	4900	322000	2416000	554000
Pto148	274000	516000	1113000	925000	1163000	88000	1340000	4650000	942000
Pto149	598000	1228000	1270000	735000	4759000	44300	1110000	3304000	550000
Pto150	457000	648000	912000	564000	1833000	5400	398000	13793000	1291000
Pto151	397000	1130000	1394000	2860000	1900000	43200	2858000	5400000	1263000
Pto152	343000	389000	612000	703000	710000	14900	1830000	7550000	1180000
Pto153	413000	804000	1218000	578000	2944000	28900	781000	3106000	413000
Pto154	341000	485000	902000	682000	1086000	8900	2091000	3431000	955000
Pto155	495000	745000	854000	1430000	1190000	133000	3430000	11800000	1800000
Pto156	419000	374000	990000	488000	547000	4110	260000	12400000	1750000
Pto157	309000	792000	1813000	642000	3754000	31600	463000	5458000	1576000
Pto158	315000	679000	1106000	756000	1685000	33900	1401000	2730000	578000
Pto159	326000	603000	527000	639000	1182000	7000	260000	7616000	977000
Pto160	370000	459000	1238000	784000	611000	13100	1665000	2182000	854000
Pto161	458000	591000	1130000	1500000	1300000	10000	930000	6750000	1100000
Pto162	573000	742000	1695000	890000	1389000	15200	1803000	1660000	558000
Pto163	431000	721000	1350000	556000	745000	45800	1655000	6118000	1064000
Pto164	391000	385000	1035000	606000	533000	9900	463000	6100000	628000
Pto165	365000	263000	868000	738000	652000	6270	1310000	4522000	757100
Pto166	425000	388000	1066000	767000	586000	5600	1106000	10353000	1208000
Pto167	505000	717000	1594000	579000	1563000	13400	580000	7085000	1553000
Pto168	458000	628000	2010000	759000	1586000	33800	1478000	4897000	484000
Pto169	490000	1092000	292000	603000	1325000	3350	406000	1992000	744000
Pto170	455000	335000	1360000	664000	451000	14000	1025000	9951000	1537000
Pto171	540000	539000	585000	617000	583000	6220	283000	19600000	1760000
Pto172	354000	515000	1553000	761000	816000	7500	2182000	3410000	661000
Pto173	443000	803000	1660000	609000	1340000	18300	726000	14500000	1640000
Pto174	764000	809000	1330000	695000	1492000	5700	455000	14515000	1847000
Pto175	334000	879000	1090000	2160000	4020000	24800	3590000	1920000	738000
Pto176	426000	790000	975000	985000	1576000	12400	601000	8749000	1202000
Pto177	363000	590000	686000	657000	2590000	16200	318000	7270000	1070000
Pto178	511000	525000	805000	690000	1590000	2510	154000	4860000	1530000
Pto179	366000	561000	1527000	805000	882000	2800	967000	7330000	1537000
Pto180	605000	503000	1490000	455000	906000	8670	207000	7280000	1100000
Pto181	548000	547000	594000	626000	592000	6300	287000	19894000	1786000
Pto182	367000	646000	874000	449000	1695000	34300	1054000	4995000	1241000
Pto183	566000	564000	624000	606000	1106000	6900	292000	11064000	1309000
Pto184	312000	631000	937000	681000	1140000	22700	1340000	5280000	1440000
Pto185	344000	925000	1066000	1218000	1512000	148200	1451000	6658000	974000
Pto186	742000	785000	1291000	675000	1448000	5600	441000	14089000	1793000
Pto187	346000	601000	1150000	644000	2470000	15300	328000	3050000	592000
Pto188	331000	851000	1076000	696000	3147000	38200	1045000	4334000	839000
Pto189	378000	352000	982000	982000	620000	10000	2466000	3684000	662000
Pto190	623000	1103000	1606000	656000	3892000	25300	538000	8877000	1389000
Pto191	350000	1010000	1240000	1750000	2970000	36100	6380000	15600000	1940000
Pto192	273000	461000	1054000	772000	619000	48600	1990000	5143000	888000
Pto193	369000	293000	973000	503000	1399000	5600	200000	5478000	1310000
Pto194	589000	489000	1074000	669000	995000	NA	341000	14581000	1103000
Pto195	451000	623000	777000	563000	1502000	4700	173000	5278000	1009000
Pto196	463000	621000	1143000	584000	1271000	14900	942000	8759000	1103000
Pto197	425000	465000	585000	667000	2296000	4500	216000	13103000	1498000
Pto198	508000	616000	1440000	451000	1450000	7710	467000	4460000	861000
Pto199	386000	861000	1350000	853000	3820000	24600	2010000	5970000	1260000
Pto200	500000	1044000	1724000	614000	3330000	24000	766000	5153000	840000
Pto201	464000	658000	926000	572000	1860000	5530	404000	14000000	1310000
Pto202	381000	301000	1003000	519000	1441000	5800	206000	5643000	1350000
Pto203	561000	697000	1908000	602000	1583000	15700	663000	3553000	715000
Pto204	491000	696000	1547000	562000	1517000	13000	563000	6877000	1507000
Pto205	444000	614000	766000	555000	1480000	4650	170000	5200000	994000
Pto206	342000	622000	518000	635000	1160000	3450	379000	3990000	787000
Pto207	545000	677000	1852000	584000	1537000	15300	643000	3448000	694000
Pto208	407000	727000	1911000	1537000	2729000	115300	5300000	5803000	1064000
Pto209	500000	607000	1419000	444000	1429000	7600	460000	4394000	848000
Pto210	339000	670000	810000	727000	1671000	23000	1318000	23300000	2540000
Pto211	537000	834000	1291000	662000	1350000	28100	1084000	2197000	423000
Pto212	508000	1060000	1750000	623000	3380000	24400	777000	5230000	853000
Pto213	388000	741000	1198000	1035000	2142000	28200	1685000	8648000	1188000
Pto214	519000	520000	1450000	437000	1330000	13500	353000	7010000	870000
Pto215	283000	482000	873000	651000	738000	29800	1299000	1898000	614000
Pto216	432000	802000	990000	1000000	1600000	12600	610000	8880000	1220000
Pto217	532000	531000	576000	608000	574000	6100	279000	19310000	1734000
Pto218	465000	637000	2040000	770000	1610000	34300	1500000	4970000	491000
Pto219	331000	612000	535000	649000	1200000	7070	264000	7730000	992000
Pto220	504000	844000	1736000	914000	1614000	59800	1624000	4659000	936000
Pto221	258000	787000	933000	1330000	836000	48400	2700000	3725000	892000
Pto222	355000	1025000	1259000	1776000	3015000	36600	6476000	15834000	1969000
Pto223	246000	864000	1117000	1045000	2903000	59300	897000	3847000	859000
Pto224	432000	427000	751000	546000	797000	2120	165000	10920000	1520000
Pto225	558000	556000	615000	597000	1090000	6750	288000	10900000	1290000
Pto226	477000	639000	1177000	602000	1309000	15300	970000	9023000	1137000
Pto227	334000	506000	995000	698000	1468000	21700	1241000	4158000	706000
Pto228	772000	496000	995000	605000	643000	16800	481000	6837000	1084000
Pto229	491000	1090000	293000	604000	1323000	3370	403000	1988000	743000
Pto230	376000	719000	1163000	1005000	2079000	27400	1635000	8394000	1153000
Pto231	329000	866000	1074000	2128000	3961000	24400	3537000	1892000	727000
Pto232	335000	731000	700000	720000	2233000	21500	421000	6516000	1056000
Pto233	361000	629000	822000	744000	1370000	6510	244000	7460000	914000
Pto234	307000	622000	923000	671000	1123000	22400	1320000	5202000	1419000
Pto235	488000	415000	1074000	694000	582000	NA	155000	8187000	893000
Pto236	527000	528000	1472000	444000	1350000	13700	358000	7115000	883000
Pto237	277000	468000	1070000	784000	628000	49300	2020000	5220000	901000
Pto238	621000	795000	1177000	1006000	2223000	24800	2071000	3959000	872000
Pto239	275000	468000	847000	632000	716000	29000	1261000	1842000	596000
Pto240	298000	460000	1035000	565000	1014000	5100	514000	11977000	1218000
Pto241	399000	1131000	1396000	2860000	1890000	43000	2861000	5401000	1260000
Pto242	285000	508000	1130000	1000000	1440000	14800	2590000	8480000	1250000
Pto243	375000	297000	988000	511000	1420000	5700	203000	5560000	1330000
Pto244	313000	618000	468000	683000	1590000	6880	427000	5000000	1130000
Pto245	323000	623000	562000	669000	1512000	3300	183000	3248000	1330000
Pto246	553000	687000	1880000	593000	1560000	15500	653000	3500000	704000
Pto247	331000	471000	876000	662000	1054000	8600	2030000	3330000	927000
Pto248	386000	752000	499000	1140000	2570000	22000	425000	3450000	486000
Pto249	226000	538000	1251000	1116000	1412000	55400	1301000	4699000	1301000
Pto250	472000	647000	2071000	782000	1634000	34800	1523000	5045000	498000
Pto251	294000	453000	1020000	557000	999000	4990	506000	11800000	1200000
Pto252	450000	815000	1685000	618000	1360000	18600	737000	14718000	1665000
Pto253	392000	874000	1370000	866000	3877000	25000	2040000	6060000	1279000
Pto254	431000	472000	594000	677000	2330000	4540	219000	13300000	1520000
Pto255	431000	427000	754000	545000	799000	2120	165000	10880000	1520000
Pto256	413000	738000	1940000	1560000	2770000	117000	5380000	5890000	1080000
Pto257	612000	783000	1160000	991000	2190000	24400	2040000	3900000	859000
Pto258	359000	713000	1492000	577000	1797000	19800	956000	5664000	885000
Pto259	429000	811000	1280000	915000	765000	53800	1360000	6140000	1100000
Pto260	351000	610000	1167000	654000	2507000	15500	333000	3096000	601000
Pto261	548000	727000	1421000	889000	1045000	2800	1360000	8029000	1228000
Pto262	347000	631000	526000	645000	1177000	3500	385000	4050000	799000
Pto263	495000	569000	1800000	817000	687000	4840	1580000	3100000	550000
Pto264	462000	622000	1010000	774000	1830000	22200	1760000	7460000	1080000
Pto265	784000	503000	1010000	614000	653000	17100	488000	6940000	1100000
Pto266	497000	832000	1710000	900000	1590000	58900	1600000	4590000	922000
Pto267	318000	614000	554000	659000	1490000	3220	180000	3200000	1310000
Pto268	501000	489000	765000	565000	801000	3300	163000	11232000	1123000
Pto269	358000	581000	676000	647000	2552000	16000	313000	7163000	1054000
Pto270	392000	763000	506000	1157000	2609000	22300	431000	3502000	493000
Pto271	404000	436000	552000	548000	784000	7040	362000	7860000	1150000
Pto272	379000	666000	900000	463000	1746000	35300	1086000	5146000	1279000
Pto273	368000	599000	696000	667000	2629000	16400	323000	7379000	1086000
Pto274	540000	716000	1400000	876000	1030000	2740	1340000	7910000	1210000
Pto275	638000	794000	1882000	646000	1172000	18700	1005000	8039000	1340000
Pto276	339000	668000	806000	725000	1669000	23100	1321000	23297000	2528000
Pto277	509000	496000	776000	573000	813000	3360	165000	11400000	1140000
Pto278	378000	483000	441000	679000	2108000	9700	315000	3241000	663000
Pto279	648000	806000	1910000	656000	1190000	19000	1020000	8160000	1360000
Pto280	436000	791000	1635000	600000	1320000	18000	715000	14286000	1616000
Pto281	469000	345000	1401000	684000	465000	14400	1056000	10252000	1583000
Pto282	379000	373000	1005000	588000	517000	9600	449000	5921000	610000
Pto283	290000	446000	1005000	549000	984000	4900	499000	11626000	1182000
Pto284	425000	380000	1005000	495000	555000	4200	264000	12586000	1776000
Pto285	414000	528000	1261000	422000	992000	11200	234000	3070000	954000
Pto286	480000	756000	1369000	1409000	1606000	25500	2227000	6404000	1419000
Pto287	380000	741000	492000	1123000	2532000	21700	419000	3399000	479000
Pto288	511000	523000	806000	691000	1600000	2530	154100	4870000	1530000
Pto289	356000	620000	810000	733000	1350000	6400	240000	7350000	900000
Pto290	582000	753000	1720000	903000	1410000	15400	1830000	1660000	566000
Pto291	451000	582000	1113000	1478000	1281000	9900	916000	6650000	1084000
Pto292	380000	848000	1330000	840000	3764000	24200	1980000	5882000	1241000
Pto293	435000	823000	1299000	929000	776000	54600	1380000	6232000	1117000
Pto294	413000	376000	1034000	745000	568000	5400	1074000	10049000	1172000
Pto295	278000	524000	1130000	939000	1180000	89300	1360000	4720000	956000
Pto296	339000	892000	1106000	2192000	4080000	25200	3644000	1949000	749000
Pto297	336000	621000	543000	659000	1218000	7200	268000	7846000	1007000
Pto298	223000	537000	1252000	1120000	1411000	54800	1306000	4701000	1300000
Pto299	502000	756000	867000	1451000	1208000	135000	3481000	11977000	1827000
Pto300	517000	503000	788000	582000	825000	3400	167000	11571000	1157000
